# Supplementary material for: Validation of the vertical profiles of HCl over the wide range of the stratosphere to the lower thermosphere measured by SMILES
Source: Copernicus journal article supplement (doi:10.5194/amt-2020-105), 2020-05-11
Supplement: Supplementary file [file amt-2020-105-AC1-supplement.pdf]

## Point-By-Point Reply to Referee Comment 1 from Anonymous Referee #2

### 1: Detailed comments

#### Reviewer Comment (1)

- **Abstract, last sentence:** The last sentence of the abstract should be moved further up, somewhere in the first third of the abstract. Acronyms should be introduced also in the abstract.

#### Author's response (1)

Thank you for pointing it out. We moved the last sentence to Line 4 – 6 and we introduced acronyms in the abstract.

#### Author's changes in the manuscript (1)

-Page 1, Line 4–6 :

Moved “The HCl vertical profile from the upper troposphere to the lower thermosphere is reported for the first time from SMILES observations; the data quality is quantified by comparison with other measurements and via theoretical error analysis” from line 24 – 25 to line 4 – 6.

-Page 1, Line 11

“SD-WACCM model” → “Whole Atmosphere Community Climate Model in specified dynamics configuration (SD-WACCM.)”

-Page 1, Line 12, 13:

“MLS” → “Microwave Limb Sounder (MLS)”

-Page 1, Line 13, 14:

“ACE-FTS” → “Atmospheric Chemistry Experiment - Fourier Transform Spectrometer (ACE-FTS)”

-Page 1, Line 14:

“TELIS” → “TERahertz and submillimeter Limb Sounder (TELIS)”

#### Reviewer Comment (2)

-**Line 86:** This is the location where a description of the temperature retrieval should be provided. It will set the stage for a lot of the discussion further below. It should answer questions such as: How is the temperature retrieved? What is the vertical range of the temperature retrieval? How accurate is it, especially in the mesosphere?

#### Author's response (2)

We are grateful for your valuable comment. The temperature was fixed and not retrieved for the HCl retrieval in the SMILES version 3.0.0 retrieval. The MLS measurements and GEOS-5 model output were combined to synthesize the temperature profile used in the HCl retrieval (Kuribayashi et al., 2017). The accuracy of the temperature profile depends on GEOS5 and MLS, not on SMILES temperature observations. The temperature profile was retrieved using the ozone transition, but was not applied in the HCl retrieval process (SMILES L2r User Guide v3.0.0). We improved our manuscript to make this point clear as follows.

#### Author's changes in the manuscript(2)

-Page 4, Line 93 – 99:

Added “ The temperature profile used in the SMILES version 3.0.0 retrieval was synthesized, assuming the hydrostatic equilibrium, using the Goddard Earth Observing System, Version 5 (GEOS-5) reanalysis meteorological datasets and the climatology based on the Aura/MLS measurements (Kuribayashi et al., 2017). The

GEOS-5 datasets were used in the upper troposphere and stratosphere, and the Aura/MLS datasets were used in the mesosphere and lower thermosphere, respectively. The temperature profile was also retrieved using the ozone transition in the SMILES version 3.0.0 retrieval process, but it was not applied to the retrieval of atmospheric species including HCl, except for ozone, to avoid systematic error propagation issues (SMILES-NICT, 2014)."

**Reviewer Comment (3)**

- Line 110: "an increasing with the altitude increased" should be "an increase with altitude"

**Author's response (3)**

Thank you for your comment. We improved the manuscript following your comment and comment given by the Anonymous Referee #1 (NUMBER).

**Author's changes in the manuscript(3)**

- Page 7, Line 124, 125 & Page 21, Line 326, 327:

"profile showed increasing with the altitude increased" → "distribution shows an increase with altitude with a maximum"

**Reviewer Comment (4)**

- Line 111: "decreased with the altitude increasing" should be "decreased with altitude"

**Author's response (4)**

We revised our manuscript as follows.

**Author's changes in the manuscript (4)**

-Page 7, Line 126 & Page 21, Line 328:

"decreased with the altitude increasing" → "a decrease with altitude"

**Reviewer Comment (5)**

- Line 116 concerning differences between SMILES and WACCM in the mesosphere: Is there an explanation for these differences? How does the high HCl near the mesopause compare with Cly at lower altitudes? Is this realistic? A depiction of the HCl/Cly ratio based SMILES HCl and Cly estimates from lower altitudes in comparison to the WACCM HCl/Cly ratio may be interesting.

**Author's response (5)**

We appreciate you pointing it out. The difference of the HCl VMR between SMILES and WACCM is 0.4 – 1.0 ppbv in the upper mesosphere and lower thermosphere. The difference is larger than the total systematic error in the SMILES HCl VMR estimated by the quantitative error analysis (0.1 – 0.4 ppbv), thus, this difference is significant. It might be caused by a combination of the SMILES observation and the WACCM model uncertainties. The underestimation of the model could be because of uncertainties in the HCl photodissociation and the reaction with OH radical, which are dominant destruction mechanisms of HCl for the mesosphere/thermosphere (Brasseur and Solomon, 2005). Also, the HCl/Cly ratio is also a quite interesting point as you mentioned. But HCl/Cly is out of focus since the subject of this paper is just validation.

**Author's changes in the manuscript (5)**

- Page 8, Line 145 – 150 : Added "At 70 – 100km, the difference of the HCl VMR between SMILES and WACCM in the upper mesosphere and lower thermosphere is 0.4 – 1.0 ppbv, which is larger than the total systematic error in the SMILES HCl VMR estimated by quantitative error analysis (0.1 – 0.4 ppbv).

Thus, the difference is significant. It might be caused by a combination of the SMILES observation and the WACCM model uncertainties. The underestimation of the model could be because of uncertainties in the HCl photodissociation and the reaction with OH radical, which are dominant destruction mechanisms of HCl for the mesosphere/thermosphere (Brasseur and Solomon, 2005). ”

**Reviewer Comment (6)**

**- Lines 138-139: How can the accuracy be smaller than the precision? In my understanding the precision is largely due to statistical errors, while the accuracy also includes systematic errors and hence should be larger than the precision. This should be corrected or explained.**

**Author’s response (6)**

Thank you for your comment. Precision in this framework is attributed to random sources of error (e.g., radiance errors), whereas accuracy is attributed to systematic errors only. Therefore, accuracy can indeed be smaller than precision. Here we referred the numbers of precision and accuracy from the document of the MLS Version 4.2x Level 2 data quality and description document (Livesey et al., 2018). In this document, precision and accuracy are defined as 0.8 and 0.3 ppbv, respectively.

**Reviewer Comment (7)**

**- Lines 155-156: The discussion of water vapor as a source for differences is not convincing. There is very little water vapor in the stratosphere around 30 km.**

**Author’s response (7)**

We appreciate your valuable point of view. We agreed with your suggestion and have removed the statement as follows. As for the discussion of the water vapor effect, we removed it because it was not verified enough. The reason for describing water vapor is the treatment of the continuum in the SMILES retrieval algorithm. In the SMILES retrieval algorithm, we do not retrieve the continuum simultaneously when deriving the species abundance, but rather we give it as a parameter. The continuum can also be seen in observed spectra at about 30 km in Fig.1. The effect of this continuum is also mentioned in the SMILES ozone validation paper (Kasai et al., 2013). On these grounds, we described it as a water vapor effect, but due to a lack of quantitative discussion, we removed it in this paper. We’re glad you pointed that out.

**Author’s changes in the manuscript (7)**

- Page 10, Line 184 – 186:

Removed “There is a possibility that this difference was caused by water vapor. The SMILES HCl profile was retrieved without considering water vapor effect and the influence of the water vapor was thus one of the possible results of the latitudinal difference.”

**Reviewer Comment (8)**

**- Line 166: What is “MAD”? Abbreviations should be introduced.**

**Author’s response (8)**

MAD is the acronym for Median Absolute Deviation.

**Author’s changes in the manuscript (8)**

- Page 12, Line 198:

“3-MAD” → “3 times the median absolute deviation (3-MAD)”

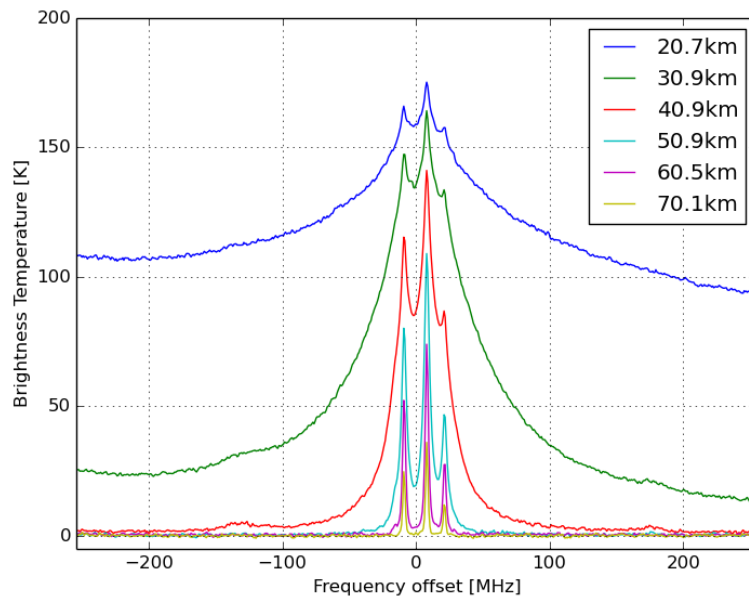

Figure 1:  $\text{H}^{35}\text{Cl}$  spectra observed by SMILES.

**Reviewer Comment (9)**

- Figure 5: For the right panel an x-axis range at which relative difference does not go off scale should be used.

**Author's response (9)**

Thank you for pointing it out. We revised that according to your advice.

**Author's changes in the manuscript (9)**

-Page 11, Figure 5, Right panel: We extended the range of the x-axis.

**Reviewer Comment (10)**

- Line 176: “overlapped” → “overlap”

**Author's response (10)**

Thank you for your advice. We revised that according to your advice.

**Author's changes in the manuscript (10)**

-Page 12, Line 209:

“overlapped” → “overlap”

**Reviewer Comment (11)**

- Line 177: “conformed” → “confirmed”

**Author's response (11)**

Thank you for pointing it out. We revised that according to your advice.

**Author's changes in the manuscript (11)**

-Page 12, Line 210:

“comformed” → “confirmed”

**Reviewer Comment (12)**

**- Line 199: The reference to Webster is ok for the mechanism but is there also a reference to the development of chlorine activation for that particular winter. That would be more relevant.**

**Author's response (12)**

We appreciate you pointing it out. We included Wegner et al., (2016) as a reference. This paper refers to chlorine activation in the Arctic winter of 2009/10 seasons.

**Author's changes in the manuscript (12)**

-Page 14, Line 233:

“Webster et al., 1993” → “Webster et al., (1993); Wegner et al., (2016)”

**Reviewer Comment (13)**

**- Line 201-202: Is there a reference that supports this statement about calibration uncertainties and their impact on the TELIS retrieval?**

**Author's response (13)**

Thank you for your comment. We included Xu et al., (2018) as a reference. This paper refers to TELIS observation.

**Author's changes in the manuscript (13)**

-Page 14, Line 236:

Added “(Xu et al., 2018)”

**Reviewer Comment (14)**

**- Figure 10: Same comment as for figure 5 for the right panel an x-axis range at which relative difference does not go off scale should be used.**

**Author's response (14)**

Thank you for your advice. We revised that according to your advice.

**Author's changes in the manuscript (14)**

-Page 16, Figure 10, Right panel:

We extended the range of the x-axis.

**Reviewer Comment (15)**

**- Table 4: I don't understand the statement in the footnote. The comparison didn't actually look that bad at these altitudes.**

**Author's response (15)**

We appreciate you pointing it out. As you pointed out, it made little sense. Thus, we removed this statement.

**Author's changes in the manuscript (15)**

-Page 17, Table 4: Remove footnote statements.

**Reviewer Comment (16-1)**

- Line 242: The paper states that “The temperature profile used for the retrieval procedure of SMILES was smaller than those of MLS and ACE-FTS particularly in the upper stratosphere, mesosphere, and lower thermosphere”, however, no temperatures for upper mesosphere, lower thermosphere are shown. This should be added, probably in figure 12.

**Author's response (16-1)**

Thank you for pointing it out. In this section, We focus our discussion on the altitude range, which allows for comparison with other satellite observation values. Thus, we removed the mention of the lower thermosphere, as this was misleading.

**Author's changes in the manuscript (16-1)**

-Page 18, Line 276, 277:

“the upper stratosphere, mesosphere, and lower thermosphere.” → “the upper stratosphere and mesosphere.”

**Reviewer Comment (16-2)**

- It should be stated how the temperatures for the other satellite measurements were derived.

**Author's response (16-2)**

We are grateful for your kind advice. The details of the a priori temperature profile for SMILES, MLS and ACE-FTS retrieval have been added. Please also find in the improved manuscript attached.

**Author's changes in the manuscript (16-2)**

-Page 20, Line 289 – 300:

Added “The a priori temperature profile used in the SMILES retrieval procedure is based on the GEOS-5 profile in the stratosphere and MLS retrieved profile above the mesosphere. The altitude limit of the MLS temperature profile is 0.001 hPa, with a vertical resolution of 6 - 14 km and a precision of 1.2 – 3.6 K per profile. MLS uses GEOS-5 up to 1 hPa as with SMILES. For pressures smaller than 1 hPa, the COSPAR International Reference Atmosphere (CIRA-86) is used as a priori temperature information (with a loose constraint) in the MLS retrieval procedure (Schwartz et al., 2008). The altitude range and vertical resolution of the CIRA-86 profile are ground to 120 km and 2 km, respectively (Fleming et al., 1990). The temperature value retrieved by MLS is 10 K lower than the a priori profile on average in some areas for pressure values smaller than 1 hPa, based on earlier version validation studies (Schwartz et al., 2008). The ACE-FTS retrieval procedure uses the retrieved temperature profile as the a priori between 18 – 125 km. The vertical resolution of ACE-FTS retrieved temperature is 3 – 4 km. The temperature values retrieved by ACE-FTS are less than 10 K larger than the MLS derived temperatures. (Schwartz et al., 2008). These types of difference are also seen in the comparison results performed here.”

**Reviewer Comment (16-3)**

- Instead of the word “smaller”, I'd maybe suggest “lower” or “colder”

**Author's response (16-3)**

Thank you for your advice. We revised that according to your advice.

**Author's changes in the manuscript (16-3)**

-Page 18, Line 276 & Page 20, Line 288, 289:

“smaller” → “lower”

**Reviewer Comment (17)**

- **Line 253: “at the altitude (of) 50–70km.” – Again, no data is shown for 70 km altitude.**

**Author’s response (17)**

We appreciate you pointing it out. We changed the altitude range from “50 – 70 km” to “for altitudes between 50 and 60 km” for the same reason as comment 16-1.

**Author’s changes in the manuscript (17)**

-Page 20, Line 289:

“50 – 70 km” → “for altitudes between 50 and 60 km”

**Reviewer Comment (18)**

- **Figure 12: The altitude scale is different in panel a compared to panels b, c, d. These panels should be plotted over the same vertical range avoid confusion. Also, the figure quality is inferior, with the lines and text kind of blurry even when zoomed in, so the figure should be redone.**

**Author’s response (18)**

Thank you for pointing it out. We revised the altitude scale that according to your advice. We also increased the resolution of the plot.

**Author’s changes in the manuscript (18)**

-Page 21, Figure 12 :

Figure improvements and corrections

**Reviewer Comment (19)**

- **Lines 260-265, discussion of bias at 55 km: What about other altitudes? Figs. 5 and 8 suggest that differences start around 40 km and increase gradually with altitude. However, Fig. 12 suggests that the temperatures around 40 km are very consistent. This behavior should be included in the discussion.**

**Author’s response (19)**

We are grateful for your kind advice. As you pointed out, we should have discussed the 40 – 60km altitude range. The behavior of the bias which increased gradually with altitude was also described in this section.

**Author’s changes in the manuscript (19)**

-Page 19, Line 301 – 303:

“The difference of the temperature profile caused increase HCl abundance by 0.12 and 0.20 ppbv at about 55 km for” → “This temperature difference caused an increase in SMILES HCl of 0.12 and 0.20 ppbv at 50 – 60 km for the”

-Page 20, Line 305:

“at 55 km” → “between 40 – 60 km”

-Page 20, Line 308, 309:

“We assumed the 3 % uncertainty in  $\gamma_{\text{air}}$  and it might cause approximately 0.1 ppbv negative bias at 55 km.” → “We assumed a 3 % uncertainty in  $\gamma_{\text{air}}$  which could lead to a –0.1 ppbv bias in the 40 – 60 km region.”

-Page 20, Line 309 – 311:

Added “In addition to the error due to the  $\gamma_{\text{air}}$  coefficients, the effect of temperature differences should be taken into account at altitudes above 50 km. The gradual increase in bias is caused by the difference in altitude at which these two errors become more pronounced. ”

-Page 20, Line 312, 313:

“approximately 0.2 ppbv negative bias” → “a negative bias of about 0.2 ppbv at 50-60 km.”

-Page 20, 21, Line 319 – 323:

“The 0.15 in 0.4 ppbv (approximately 40 %) negative bias between SMILES and MLS was explained. Conclusively, our theoretical error analysis showed that the SMILES HCl a had negative bias of 0.2–0.25 ppbv at 55 km which were consistent with the difference from the MLS and ACE-FTS within the 1  $\sigma$  standard deviation.”

→ “About 40 % (0.15 out of 0.4 ppbv) of the negative bias between SMILES and MLS can be explained. Therefore, our theoretical error analysis shows that the SMILES HCl has a negative bias of at most 0.25 ppbv between 40 and 60 km; remaining difference between SMILES and MLS or ACE-FTS can be explained by the standard deviation in the comparison result. ”

-page 22, Line 348:

“the negative bias of 0.12 and 0.20 ppbv at about 55 km” → “a negative bias of 0.12 to 0.20 ppbv between 50 – 60 km”

-Page 22, Line 352 – 354:

“our theoretical error analysis showed that the SMILES HCl had negative bias of 0.20–0.25 ppbv at 55 km which were consistent with the difference from the MLS and ACE-FTS within the 1  $\sigma$  standard deviation.”

→ “our theoretical error analysis showed that the HCl profiles had a negative bias of 0.20 – 0.25 ppbv at 50 – 60 km, which is consistent with the observed differences versus MLS and ACE-FTS profiles within 1 standard deviation.”

#### **Reviewer Comment (20)**

- **Line 292:** “Totally,” – I suggest maybe “In Summary,”

#### **Author’s response (20)**

Thank you for pointing it out. We revised that according to your advice.

#### **Author’s changes in the manuscript (20)**

-Page 22, Line 352:

“Totally” → “In summary”

#### **Reviewer Comment (21)**

- **Line 295:** “above stratosphere” – I suggest “above the stratopause”

#### **Author’s response (21)**

Thank you for your comment. We revised that according to your advice.

#### **Author’s changes in the manuscript (21)**

-Page 22, Line 355:

“above stratosphere” → “above the stratopause”



## **2: Other minor changes in the manuscript.**

### **Author's changes in the manuscript (22)**

-Page 8, Line 141, 142:

Moved "Differences of HCl abundance between SMILES and SD-WACCM are shown in the panel (C)." from page 8, Line 133, 134 to page 8, Line 141, 142

### **Author's changes in the manuscript (23)**

-Page 8, Line 144, 145:

Moved "The SMILES HCl abundance agrees well with SD-WACCM simulation (within 0.1 ppbv) in the stratosphere and middle mesosphere." from page 8, Line 134, 135 to page 8, Line 144, 145

### **Author's changes in the manuscript (24)**

-Page 10, Line 180 & 182:

"Panels" → "Panel"

### **Author's changes in the manuscript (25)**

-Page 18, Line 273:

"above 40 km" → "between 40 – 60 km"

### **Author's changes in the manuscript (26)**

-Page 19, Line 281:

"with perturbation" → "with a perturbation"

### **Author's changes in the manuscript (27)**

-Page 19, Line 281:

Removed "the"

### **Author's changes in the manuscript (28)**

-Page 19, Line 286, 287:

"The vertical profile of temperature used for the retrieval procedure of" → "The temperature profiles used in the retrievals by"

### **Author's changes in the manuscript (29)**

-Page 20, Line 288:

Removed "the"

### **Author's changes in the manuscript (30)**

-Page 20, Line 303:

"MLS and ACE-FTS" → "MLS and ACE-FTS comparisons"

### **Author's changes in the manuscript (31)**

-Page 20, Line 307, 308 :

"temperature profile used in retrieval calculation" → "the temperature profiles used in the retrievals"

### **Author's changes in the manuscript (32)**

-Page 20, Line 314, 315:

"SMILES and ACE-FTS was explained by the uncertainty in  $\gamma_{\text{air}}$  and temperature profile used in the retrievals." → "SMILES and ACE-FTS can be explained by the uncertainty in  $\gamma_{\text{air}}$  and the temperature profiles used in the SMILES retrievals."

**Author's changes in the manuscript (33)**

-Page 20, Line 317, 318:

“The 1 % difference of  $\gamma_{\text{air}}$  might cause the HCl abundance increase about 0.03 ppbv at 55 km” → “A 1 % difference in  $\gamma_{\text{air}}$  might cause the HCl abundance to increase by about 0.03 ppbv”

**Author's changes in the manuscript (34)**

-Page 22, Line 334:

“at altitude 30 to 70 km” → “for altitudes between 30 and 70 km.”

**Author's changes in the manuscript (35)**

-Page 22, Line 335, 336:

“the comparison study with other instrument measurements and the theoretical error analysis”  
→ “comparisons versus other measurements, and supported by a theoretical error analysis”

**Author's changes in the manuscript (36)**

-Page 22, Line 337:

“with the” → “, versus”

**Author's changes in the manuscript (37)**

-Page 22, Line 340, 341:

Added “the”

“with in the difference of” → “with differences within”

**Author's changes in the manuscript (38)**

-Page 22, Line 342, 343:

“compared to the MLS and ACE-FTS” → “in comparisons versus MLS and ACE-FTS HCl profiles.”

**Author's changes in the manuscript (39)**

-Page 22, Line 344, 345:

“We estimated the total error based on the perturbation method and error due to the uncertainty in the atmospheric temperature profile used in the retrieval calculation.”

→ “We estimated the total error for SMILES HCl based on the perturbation method and considering the uncertainties in atmospheric temperature profiles used in the retrievals.”

**Author's changes in the manuscript (40)**

-Page 22, Line 350, 351:

“the temperature profile were capable of totally contributing up to 40 – 50 % of the negative bias in 50 – 60 km altitudes.” →

“the temperature profile are capable of contributing a total of 40 – 50 % of the SMILES HCl negative biases at 50 – 60 km.”

**Author's changes in the manuscript (41)**

-Page 22, Line 357, 358:

Removed “quantitative estimations of the”

**Author's changes in the manuscript (42)**

-Page 22, Line 358, 359:

“Further observations and model studies regarding HCl abundance including upper atmosphere are needed to understand the source and sinks”

→ “Further observations and model studies are needed to better understand the sources and sinks, ”

**Author's changes in the manuscript (43)**

-Page 14, Fig. 8 & Page 15, Fig. 9 & Page 21, Fig. 12:  
We changed the color of the ACE-FTS plot from red to green.

**Author's changes in the manuscript (44)**

-Page 14, Line 212 & Page 14, Fig. 8, caption & Page 15, Fig. 9, caption & Page 21, Fig. 12, caption:  
“red” → “green”

# Validation of the vertical profiles of HCl over the wide range of the stratosphere to the lower thermosphere measured by SMILES

Seidai Nara<sup>1,2</sup>, Tomohiro O. Sato<sup>1</sup>, Takayoshi Yamada<sup>1</sup>, Tamaki Fujinawa<sup>3</sup>, Kota Kuribayashi<sup>4</sup>, Takeshi Manabe<sup>5</sup>, Lucien Froidevaux<sup>6</sup>, Nathaniel J. Livesey<sup>6</sup>, Kaley A. Walker<sup>7</sup>, Jian Xu<sup>8</sup>, Franz Schreier<sup>8</sup>, Yvan J. Orsolini<sup>9</sup>, Varavut Limpasuvan<sup>10</sup>, Nario Kuno<sup>2</sup>, and Yasuko Kasai<sup>1,2</sup>

<sup>1</sup>National Institute of Information and Communications Technology, Nukui-kita, Koganei, Tokyo 184-8795, Japan

<sup>2</sup>University of Tsukuba, Tennodai, Tsukuba, Ibaraki 305-8577, Japan

<sup>3</sup>National Institute of Environmental Studies, Onogawa, Tsukuba, Ibaraki 305-8506 Japan

<sup>4</sup>Mynavi Corporation, Tokyo, Japan

<sup>5</sup>Osaka Prefecture University, Gakuen-cho, Naka-ku, Sakai, Osaka 599-8531, Japan

<sup>6</sup>Jet Propulsion Laboratory, California Institute of Technology, Pasadena, CA USA

<sup>7</sup>Department of Physics, University of Toronto, 60 St. George Street, Toronto, Ontario, M5S 1A7, Canada

<sup>8</sup>German Aerospace Center (DLR), Remote Sensing Technology Institute, 82234 Oberpfaffenhofen, Germany

<sup>9</sup>Norwegian Institute for Air Research (NILU), Kjeller, Norway

<sup>10</sup>School of Coastal and Marine Systems Science, Coastal Carolina University, Conway, South Carolina, USA

**Correspondence:** Y. Kasai (ykasai@nict.go.jp)

**Abstract.** Hydrogen chloride (HCl) is the most abundant (more than 95 %) among inorganic chlorine compounds  $\text{Cl}_y$  in the stratosphere. The HCl molecule ~~has been~~ is observed to obtain long-term quantitative estimations of total budget of the stratospheric anthropogenic chlorine compounds. In this study, we provided HCl vertical profiles at altitudes of 16–100 km using the superconducting submillimeter-wave limb-emission sounder (SMILES) from space. The HCl vertical profile from the upper troposphere to the lower thermosphere is reported for the first time from SMILES observations; the data quality is quantified by comparison with other measurements and via theoretical error analysis. We used the SMILES Level-2 research product version 3.0.0. The period of the SMILES HCl observation was from October 12, 2009 to April 21, 2010, and the latitude coverage was 40°S–65°N. The average HCl vertical profile showed an increase with altitude up to the stratopause (~45 km), approximately constant values between the stratopause and the upper mesosphere (~80 km), and a decrease from the mesopause to the lower thermosphere (~100 km). This behavior was observed in the all latitude regions, and reproduced by the Whole Atmosphere Community Climate Model in specified dynamics configuration (SD-WACCM~~model~~). We compared the SMILES HCl vertical profiles in the stratosphere and lower mesosphere with HCl profiles from MLS-Microwave Limb Sounder (MLS) on the Aura satellite, as well as from Atmospheric Chemistry Experiment - Fourier Transform Spectrometer (ACE-FTS) on SCISAT and from TELIS-Terahertz and submillimeter Limb Sounder (TELIS) (balloon-borne). The TELIS observations were performed using the superconductive limb emission technique, as used by SMILES. The globally averaged vertical HCl profiles of SMILES ~~well agreed~~ agreed well with those of MLS and ACE-FTS within 0.25 and 0.2 ppbv between 20 and 40 km ~~, respectively.~~ (within 10% between 30 and 40 km. There's a larger discrepancy below 30km.), respectively. The SMILES HCl concentration was smaller than those of MLS and ACE/FTS as the altitude increased from 40 km, and the difference was approximately 0.4–0.5 ppbv (12 – 15%) at 50–60 km. The difference between SMILES and TELIS HCl

20 observations was about 0.3 ppbv in the polar winter region between 20 and 34 km, except near 26 km. SMILES HCl error  
sources that may cause discrepancies with the other observations are investigated by a theoretical error analysis. We calculated  
errors caused by the uncertainties of spectroscopic parameters, instrument functions, and atmospheric temperature profiles.  
The jacobian for the temperature explains the negative bias of the SMILES HCl ~~concentration~~ concentrations at 50–60 km.  
~~The HCl vertical profile from the upper troposphere to the lower thermosphere is reported for the first time from SMILES~~  
25 ~~observations; the data quality is quantified by comparisons with other measurements and via theoretical error analysis.~~

## 1 Introduction

Hydrogen chloride (HCl) is the most abundant species of all total inorganic chlorine compounds  $\text{Cl}_y$  in the stratosphere. More  
than 95 % of  $\text{Cl}_y$  exists as HCl at about 1 hPa ( $\sim 50$  km) (see Froidevaux et al. (2008)). Thus, HCl has been used for long-term  
quantitative estimates of the total budget of stratospheric chlorine (WMO, 2010). Stratospheric HCl vertical profiles have been  
30 observed globally by several satellites. The halogen occultation experiment (HALOE) on the Upper Atmosphere Research  
Satellite measured the stratospheric HCl profiles continuously from late 1991 through November 2005 (Russell III et al.,  
1996). Comparisons of HCl profiles obtained by the Aura Microwave Limb Sounder (MLS) and the Atmospheric-Chemistry-  
Experiment Fourier-Transform Spectrometer (ACE-FTS) have been reported by Froidevaux et al. (2008) and Mahieu et al.  
(2008). These profiles agreed within 5% (0.15 ppbv) at 0.5 hPa ( $\sim 53$  km). The Aura/MLS and ACE-FTS HCl concentrations  
35 were larger (by 10% – 20%) than those from HALOE ~~HCl (WMO, 2010).~~ (WMO, 2010). Balloon-borne remote sensing in  
polar winter region was performed using the TERAHERTZ and submillimeter Limb Sounder (TELIS) from 2009 to 2011 (Birk  
et al., 2010). Xu et al. (2018) reported the error analysis and comparison of some trace gas profiles provided by TELIS.

The superconducting submillimeter-wave limb-emission sounder (SMILES) was launched in 2009 to observe the atmo-  
spheric compositions of ozone and species related to the stratospheric ozone destruction cycle including HCl (Kikuchi et al.,  
40 2010). The SMILES mission is a joint project of the Japan Aerospace Exploration Agency and the National Institute of Infor-  
mation and Communications Technology (NICT). The SMILES is an instrument used to conduct limb observations from the  
International Space Station (ISS) using super-sensitive 4 K superconducting receivers in the submillimeter-wave regions (625  
and 649 GHz bands). The non-sun-synchronous circular orbit of the ISS gave us an opportunity for observations of HCl pro-  
files at different local times. The unprecedented low noise of the SMILES instrument provided a sensitivity 10 times superior  
45 to those of previous microwave/sub-millimeter limb emission instruments used to observe HCl spectra from space (Kikuchi  
et al., 2010). The SMILES observations were used to reveal small abundances of atmospheric species in the stratosphere and  
mesosphere (e.g. Sato et al. (2017); Yamada et al. (2020))

A comparison of the HCl profiles inside the Antarctic vortex has been performed for November 19–24, 2009 using the  
SMILES, Aura/MLS, and ACE-FTS data (Sugita et al., 2013). The SMILES HCl values (version 2.1.5 of NICT products)  
50 agreed within 10 % (0.3 ppbv) with those of the MLS and ACE-FTS HCl data between the potential-temperature levels of  
450 and 575 K and 425 and 575 K, respectively. In contrast to the previous study, this study used version 3.0.0 SMILES data

and provided a global comparison, including the stratosphere and mesosphere. The HCl climatology using SMILES NICT version 2.1.5 was reported by Kreyling et al. (2013).

In this study, ~~SMILES observations of~~ we examined HCl vertical profiles from 16–100 km, including the upper mesosphere and lower thermosphere (MLT) region. We used the SMILES NICT Level-2 product version 3.0.0 (v300), which was released in late 2012 (<http://smiles.nict.go.jp/pub/data/index.html>). HCl vertical profiles from the upper troposphere to the lower thermosphere are reported for the first time. We perform a validation of the SMILES HCl vertical profiles by comparisons with the corresponding global model results of SD-WACCM, satellite observations from MLS and ACE-FTS, balloon-borne observations from TELIS and we provide a SMILES HCl error analysis.

The SMILES HCl observations and retrieval procedure are described in Sect. 2. The HCl vertical profile derived by the SMILES product and comparisons of HCl distribution between 40°S–60°N with SD-WACCM are shown in Sect. 3. Results of HCl comparisons between SMILES and other instruments are described in Sect. 4. An estimation of the systematic and random errors is presented in Sect. 5. Section 6 describes our conclusions.

## 2 SMILES HCl ~~observation~~observations

The SMILES instrument had been attached to the Japanese Experimental Module (JEM) on the ISS, since September 2009. ~~The period of the SMILES observation was from~~ SMILES operational period started on October 12, 2009 ~~to and ended on~~ April 21, 2010. The ISS has a non-sun-synchronous circular orbit with an inclination angle of 51.6° with respect to the equator. The height of the ISS changed slowly over the observational period ranging 340–360 km. We tilted the line-of-sight at a 45° angle in the direction of the forward movement of the ISS to observe the northern polar region. The SMILES parameters are summarized in Table 1. The details of the SMILES ~~observation~~observations are described in Kikuchi et al. (2010) and in an ozone-validation paper by Kasai et al. (2013), respectively.

Herein, we briefly describe the SMILES atmospheric observations in terms of the HCl spectra. The SMILES had three frequency bands in the submillimeter-wave regions, Band A (624.32–625.52 GHz), Band B (625.12–626.32 GHz), and Band C (649.12–650.32 GHz). Each single-scan provided a combination of two out of three of the frequency bands: Bands A+B, C+B, ~~and or~~ C+A. The combinations changed on a daily basis, as described in Kikuchi et al. (2010). The rotational transitions of two HCl isotopologues were located in Bands B and A for H<sup>35</sup>Cl at 625.9 GHz and H<sup>37</sup>Cl at 624.9 GHz, respectively. Two acousto-optical spectrometers (AOSs) were equipped in the SMILES instrument. The spectral resolution obtained by AOS1 and AOS2 was 0.8 MHz. The band configuration for each HCl isotopologues had three patterns as follows:

- a) H<sup>37</sup>Cl observation by Band-A with AOS1,
- b) H<sup>37</sup>Cl observation by Band-A with AOS2,
- c) H<sup>35</sup>Cl observation by Band-B with AOS2.

Band-B was always associated with AOS2.

Figure 1 shows the number of observations per day obtained for H<sup>35</sup>Cl (Band-B) and H<sup>37</sup>Cl (Band-A) for 5° latitude bins during the SMILES observational period. It should be noted that the sampling is not homogeneously distributed for the

**Table 1.** SMILES specification

| Parameter                | Characteristics                                                                                        |
|--------------------------|--------------------------------------------------------------------------------------------------------|
| Orbit                    | Non-sun-synchronous orbit<br>Inclination angle 51.6°<br>Altitude 340–360 km<br>~ 90-min orbital period |
| Latitude coverage        | 38°S–65°N(nominal)                                                                                     |
| Measurement geometry     | Limb scan                                                                                              |
| Number of scans          | 1630 scans per day                                                                                     |
| Integration time         | 0.47 s                                                                                                 |
| Frequency range          | 624.32–625.52 GHz (Band-A)<br>625.12–626.32 GHz (Band-B)<br>649.12–650.32 GHz (Band-C)                 |
| Receiver system          | SIS <sup>*1</sup> mixer and HEMT <sup>*2</sup> amplifiers                                              |
| Spectrometer             | Acousto-Optical Spectrometers<br>(AOS1 and AOS2)                                                       |
| Frequency resolution     | 0.8 MHz                                                                                                |
| System noise temperature | ~ 350 K                                                                                                |

\*1: Superconductor-Insulator-Superconductor, \*2: High-Electron-Mobility Transistor

85 SMILES observations. The SMILES instrument was sometimes not in operation, for example, when the ISS was boosted up from a low to a high altitude, and the solar panels disturbed the observational line-of-sight. The SMILES observational latitude range was 65°N–38°S in nominal operations, and changed to 38°N–65°S when the ISS performed a yaw maneuver of 180°, which happened three times during the 7-month-long observational period.

We used the SMILES NICT Level 2 product version 3.0.0 (v300) for this study. The general method of v300 for the HCl  
90 retrieval is similar to that of the Level 2 product version 2.1.5 (v215) (Kasai et al., 2013). The major updates from the v215 product are as follows: 1) An improvement in the spectrum calibration, particularly for the gain non-linearity of the receiver system (Ochiai et al., 2013), 2) An improvement in the accuracy of the tangent height estimation (Ochiai et al., 2013), and 3) An update of the temperature retrieval. ~~The~~ The temperature profile used in the SMILES version 3.0.0 retrieval was synthesized, assuming the hydrostatic equilibrium, using the Goddard Earth Observing System, Version 5 (GEOS-5) reanalysis meteorological datasets and the climatology based on the Aura/MLS measurements (Kuribayashi et al., 2017). The GEOS-5 datasets were used in the upper troposphere and stratosphere, and the Aura/MLS datasets were used in the mesosphere and lower thermosphere, respectively. The temperature profile was also retrieved using the ozone transition in the SMILES version 3.0.0 retrieval process, but it was not applied to the retrieval of atmospheric species including HCl, except for ozone, to avoid systematic error propagation issues (SMILES-NICT, 2014). The level 1b spectrum data version 008 was used for the SMILES

**Table 2.** Spectroscopic line parameters measured in the laboratory and used in the processing.

| Species                  | Line frequency [MHz]      | Air-broadening [MHz/Torr]<br>/temperature dependence | Frequency shift [MHz] |
|--------------------------|---------------------------|------------------------------------------------------|-----------------------|
| $\text{H}^{35}\text{Cl}$ | 625 901.6627 <sup>a</sup> | 3.39/0.72 <sup>b</sup>                               | 0.145 <sup>b</sup>    |
|                          | 625 918.7020 <sup>a</sup> |                                                      |                       |
|                          | 625 931.9977 <sup>a</sup> |                                                      |                       |
| $\text{H}^{37}\text{Cl}$ | 624 964.3718 <sup>a</sup> | 3.39/0.72 <sup>b</sup>                               | 0.145 <sup>b</sup>    |
|                          | 624 977.8059 <sup>a</sup> |                                                      |                       |
|                          | 624 988.2727 <sup>a</sup> |                                                      |                       |

a: Laboratory measurements by Cazzoli and Pazzarini (2004). b: Baron et al. (2011)

100 NICT Level 2 product v300 (Ochiai et al., 2013). The spectroscopic parameters for the HCl retrieval were based on Cazzoli and Pazzarini (2004) and Laboratory measurement, as summarized in Table.2. We used only the  $\text{H}^{35}\text{Cl}$  data because the intensities of the  $\text{H}^{37}\text{Cl}$  spectra were weaker than those of  $\text{H}^{35}\text{Cl}$ , as shown in Fig. 2.

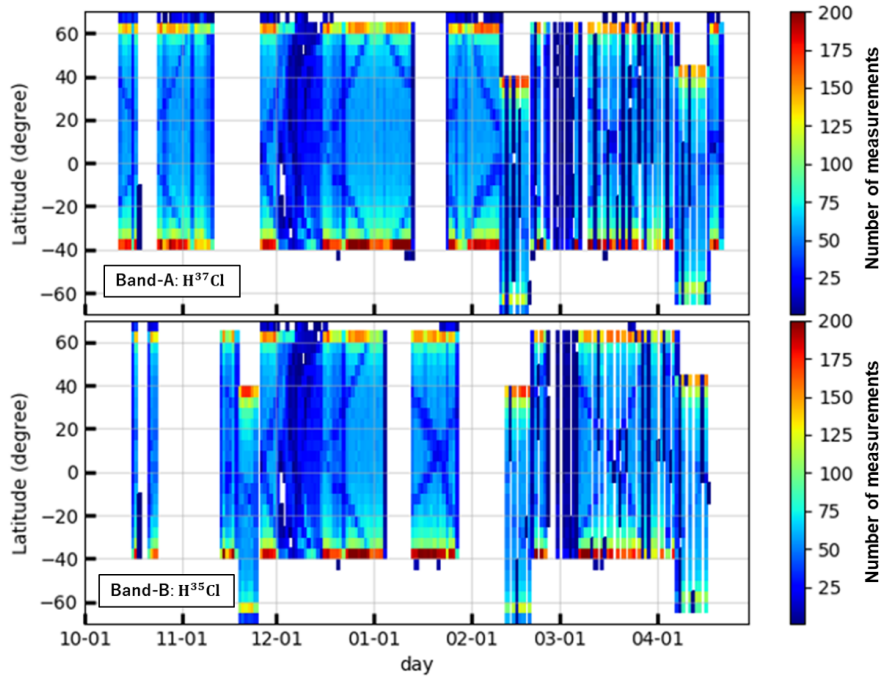

**Figure 1.** Number of HCl observations for a  $5^\circ$  latitude bin in 1 day for the range of SMILES observational latitudes and period (October 12, 2009 – April 21, 2010). The top and bottom panels show the number of observations from Band-A ( $\text{H}^{37}\text{Cl}$ ) and Band-B ( $\text{H}^{35}\text{Cl}$ ), respectively.



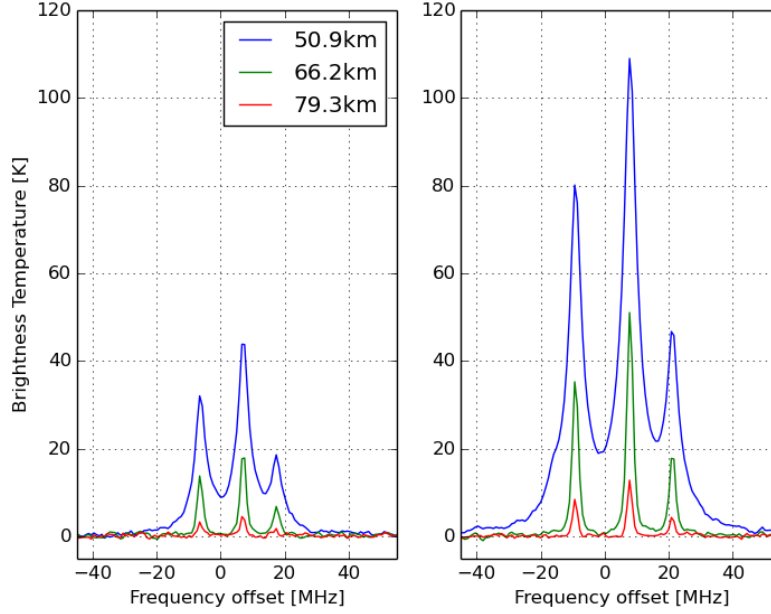

**Figure 2.** Left: An example of the  $\text{H}^{37}\text{Cl}$  [spectrum-spectra](#) observed by SMILES from a single scan measurement. Tangent heights are approximately 50, 65, and 80 km. Center frequency is 624.98 GHz. Right: An example of the  $\text{H}^{35}\text{Cl}$  [spectrum-spectra](#) for the same condition as for the  $\text{H}^{37}\text{Cl}$  [spectrum-spectra](#). Center frequency is 625.92 GHz.

The criteria for the selection of the  $\text{H}^{35}\text{Cl}$  profiles used in this study are as follows: (1)  $\chi^2$  less than 0.8.  $\chi^2$  is defined by

$$\chi^2 = [\mathbf{y} - \mathbf{F}(\mathbf{x})]^T \mathbf{S}_\epsilon^{-1} [\mathbf{y} - \mathbf{F}(\mathbf{x})] + [\mathbf{x} - \mathbf{x}_a]^T \mathbf{S}_a^{-1} [\mathbf{x} - \mathbf{x}_a] \quad (1)$$

105  $\mathbf{y}$  is [the](#) observed spectrum,  $\mathbf{S}_\epsilon$  is the covariance matrix of the measurement noise,  $\mathbf{x}_a$  is the a priori state,  $\mathbf{S}_a$  is the covariance matrix of  $\mathbf{x}_a$ , and  $\mathbf{F}(\mathbf{x})$  is the forward model depending on the state vector  $\mathbf{x}$ . [We used the U.S. standard atmosphere profiles as the a priori state \( \$\mathbf{x}\_a\$ \) \(US-Standard, 1976\). They are used separately for polar, equatorial, summer mid-latitude, or winter mid-latitude regions.](#) The forward model is essentially the atmospheric radiative transfer and the instrument model. (2) measurement response, MR, between 0.8 and 1.2 for each vertical grid. MR is defined by

$$110 \quad \text{MR}[i] = \sum_j \mathbf{A}[i,j] \quad (2)$$

$\mathbf{A}$  is the averaging kernel matrix. A value of MR near unity indicates that most of the information in the retrieval results is provided by observations. A low value of MR indicates that the retrieval results are largely influenced by the a priori state and are forced to be identical to a priori values.

An example  $\text{H}^{35}\text{Cl}$  profile and its averaging kernel are presented in Fig. 3 for the single scan spectrum observation at latitude  
115 of  $38.3^\circ$  N, longitude of  $12.7^\circ$  E, and solar zenith angle (SZA) of  $160.9^\circ$  on 15 November 2009. We assumed that the natural

isotopic abundance of  $\text{H}^{35}\text{Cl}/\text{HCl}$  was 0.7576 [by Berglund and Wieser \(2011\)](#) for these retrievals. The peak values of the averaging kernels for the SMILES  $\text{H}^{35}\text{Cl}$  profiles exceeded 0.8 in the height range of 16 km to 90 km ( $\sim 100$  hPa to 0.001 hPa) as shown in Fig. 3. The full width at half maximum (FWHM) of the averaging kernels is approximately 3–4 km at altitudes of 18 km–50 km and becomes greater than 5 km for the [altitude-of-altitudes](#) 50 km–90 km.

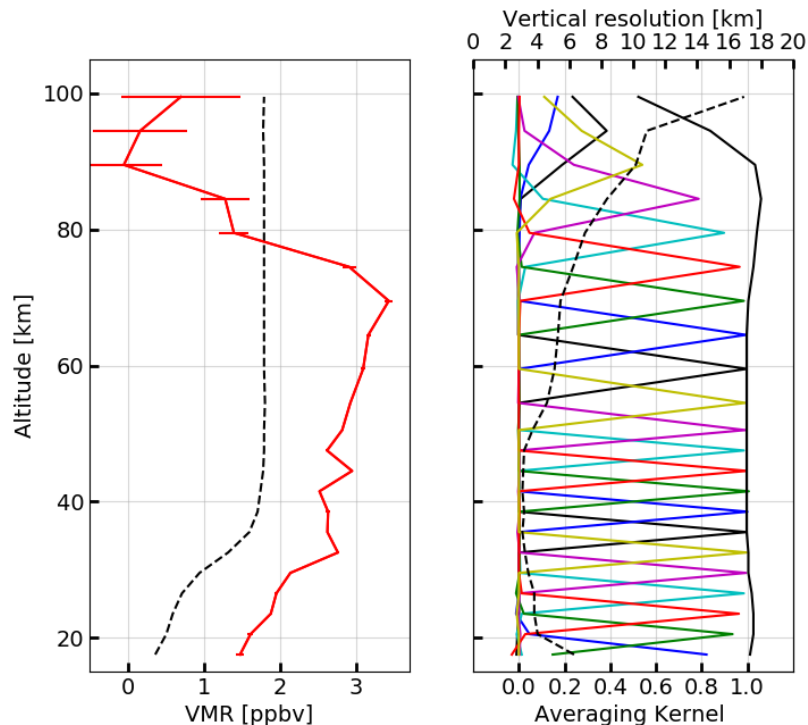

**Figure 3.** Left: An example of a HCl profile retrieved from the  $\text{H}^{35}\text{Cl}$  spectrum on November 15, 2009 at a latitude of  $38.3^\circ\text{N}$ , longitude  $12.7^\circ\text{E}$ , and SZA of  $160.9^\circ$ . The solid red line indicates the retrieved HCl volume mixing ratio (VMR), and the error bar is the root sum square of the smoothing and measurement errors. The dashed black line is an a priori HCl profile used for the retrieval procedure. The right panel shows the averaging kernel, the measurement response (indicated by the thick black line) and the FWHM of the averaging kernel profile (indicated by the thick dashed black line).

### 120 3 Vertical and latitudinal distribution of SMILES HCl

In this section, we provide the HCl vertical profiles derived from the SMILES NICT Level 2 product v300. Figure 4 (A) shows the HCl zonal mean distribution in the latitudinal range from  $40^\circ\text{S}$  to  $60^\circ\text{N}$ . The [observation-periods-are-time-period-is-between](#) October 16, 2009–December 15, 2009 (Left), December 16, 2009–February 15, 2010 (Middle), and February 16, 2010–April 17, 2010 (Right). The HCl vertical [profile-showed-an-increasing-with-the-altitude-increased-distribution](#)

125 shows an increase with altitude with a maximum below the stratopause ( $\sim 45$  km), approximately constant values between  
the stratopause and the upper mesosphere ( $\sim 80$  km), and ~~decreased with the altitude increasing a decrease with altitude~~ from  
the mesopause to the lower thermosphere ( $\sim 100$  km). In the lower and middle stratosphere, HCl is generated by the reaction  
of Cl with CH<sub>4</sub> and HO<sub>2</sub> and transported by circulation (e.g. Brewer-Dobson circulation). The HCl abundance is balanced by  
production (Cl + HO<sub>2</sub> → HCl + O<sub>2</sub>) and loss (HCl + OH → Cl + H<sub>2</sub>O, HCl + hν → H + Cl) in the upper stratosphere and  
130 mesosphere. Near the mesopause, the photodissociation becomes the dominant reaction, and the HCl abundance decreases with  
height (Brasseur and Solomon, 2005).

This behavior was reproduced by the Whole Atmosphere Community Climate Model version 4 (WACCM4) in specified  
dynamics configuration (SD-WACCM) (Lamarque et al., 2012; Limpasuvan et al., 2016), see the panel (B). ~~Differences of~~  
~~HCl abundance between SMILES and SD-WACCM are shown in the panel (C). The SMILES HCl abundance agrees well~~  
135 ~~with SD-WACCM simulation (within 0.1 ppbv) in the stratosphere and middle mesosphere. At 70 – 100 km, the SMILES~~  
~~HCl abundances are about 0.4 – 1.3 ppbv larger than in the SD-WACCM simulation. For these comparisons, the SD-WACCM~~  
~~profiles are interpolated linearly for each SMILES observation point and time from the nearest model positions and times.~~ In the  
specified dynamics configuration, the simulated meteorological fields in the troposphere and stratosphere are constrained to the  
Global Modeling and Assimilation Office Modern-Era Retrospective Analysis for Research and Applications (Rienecker et al.,  
140 2011). The horizontal resolution of SD-WACCM simulation is  $1.9^\circ$  and  $2.5^\circ$  for latitude and longitude, respectively. The verti-  
cal grid is from the ground to 150 km with 88 levels, and the time resolution is 3 hours. Differences of HCl abundance between  
SMILES and SD-WACCM are shown in the panel (C). For these comparisons, the SD-WACCM profiles are interpolated  
linearly for each SMILES observation point and time from the nearest model positions and times. The panel (D) shows the  
number of selected SMILES ~~observation-~~ observations. The SMILES HCl abundance agrees well with SD-WACCM simulation  
145 (within 0.1 ppbv) in the stratosphere and middle mesosphere. At 70 – 100 km, the difference of the HCl VMR between SMILES  
and WACCM in the upper mesosphere and lower thermosphere is 0.4 – 1.0 ppbv, which is larger than the total systematic error  
in the SMILES HCl VMR estimated by quantitative error analysis (0.1 – 0.4 ppbv). Thus, the difference is significant. It might  
be caused by a combination of the SMILES observation and the WACCM model uncertainties. The underestimation of the  
model could be because of uncertainties in the HCl photodissociation and the reaction with OH radical, which are dominant  
150 destruction mechanisms of HCl for the mesosphere/thermosphere (Brasseur and Solomon, 2005).

#### 4 Comparison of SMILES HCl profile with those obtained using other instruments

We performed a comparison between SMILES HCl products and other datasets obtained using the MLS on the Aura satellite,  
the ACE-FTS on the SCISAT satellite, and the balloon-borne TELIS instrument. The characteristic of instruments and datasets  
are summarized in Table 3. The mean absolute difference between SMILES and the other instrument is defined as

$$155 \quad \Delta_{\text{abs}}(z) = \frac{1}{N(z)} \sum_{i=1}^{N(z)} x_c(z) - x_s(z), \quad (3)$$

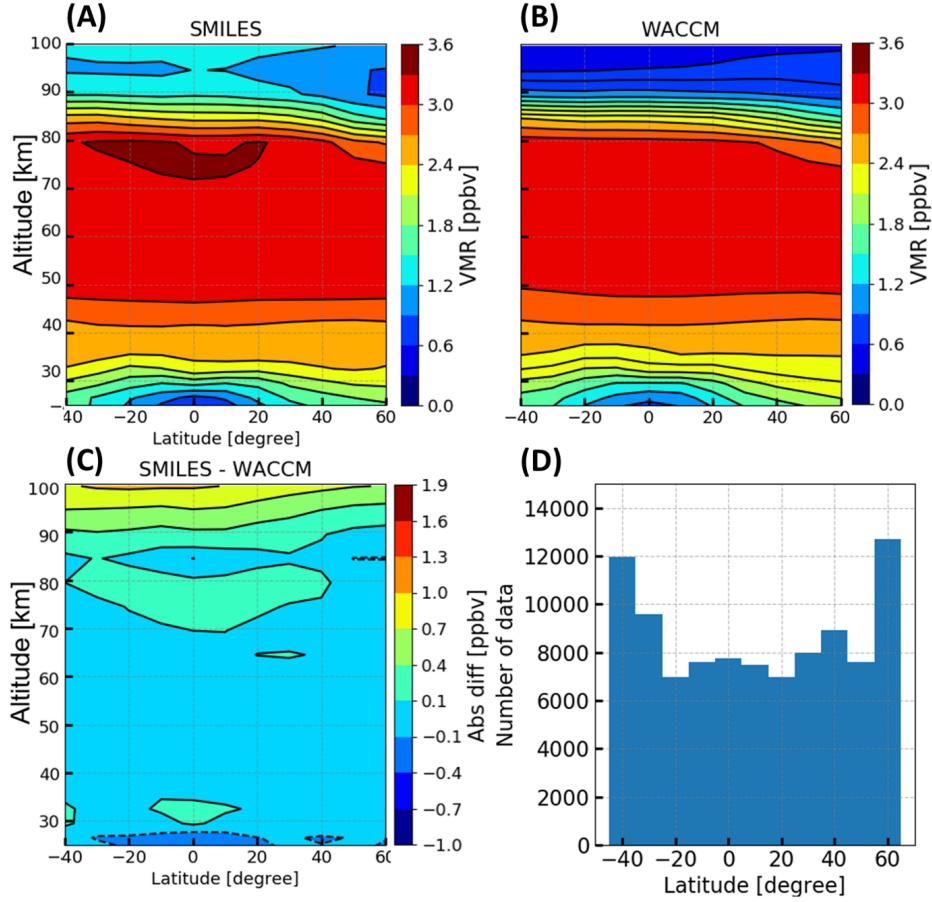

**Figure 4.** Zonal mean distribution of HCl from SMILES, SD-WACCM and their differences (SMILES - SD-WACCM) are shown in **rows panel** (A), (B), and (C), respectively. Each panel displays distributions as a function of latitude (x-axis) and altitude (y-axis) **in three time range**. The latitude range covers between 40°S and 60°N. The number of HCl profiles observed by SMILES is described in **panel** (D) **row** as a histogram versus latitude. **Left panel: Time range** **The time period is** between October 16, 2009 and **December 15, 2009**. **Middle panel: Between December 16, 2009 and February 15, 2010**. **Right panel: Between February 16, 2010 and April 17, 2010**. The data **was is** averaged within **a latitude bin bins** of 10°.

where  $x_s(z)$  and  $x_c(z)$  are the HCl volume mixing ratio (VMR) at an altitude  $z$  for SMILES and the other instrument, respectively.  $N(z)$  is the number of coincidence at an altitude  $z$ .

The mean relative difference (in percentage) is given by

$$\Delta_{\text{rel}}(z) = \frac{1}{N(z)} \sum_{i=1}^{N(z)} \frac{x_c(z) - x_s(z)}{(x_c(z) + x_s(z))/2} \times 100. \quad (4)$$

160 The coincidence criteria between the SMILES observations and those of the other instruments was set to within 2° for latitude, 8° for longitude, and 5 h for time, following the previous work ~~of the~~ on MLS observations (Froidevaux et al., 2008).

**Table 3.** Characteristics of instruments and data sets used in the comparison.

| Instrument & Platform | Measurement type  | Time period overlapped with SMILES (yyyy/mm/dd) | Data <del>version-</del> <u>version</u> | Number of <del>coincident observations-</del> <u>coincidence</u> | <u>Altitude range</u>    | <u></u> |
|-----------------------|-------------------|-------------------------------------------------|-----------------------------------------|------------------------------------------------------------------|--------------------------|---------|
| MLS                   | Limb emission     | 2010/01/24                                      | 4.2                                     | 4356                                                             | <u>100 – 0.32 hPa</u>    | <u></u> |
| Aura                  | sub-mm/microwave  | - 2010/01/27 (Band-13)                          |                                         |                                                                  |                          | <u></u> |
| ACE-FTS               | Solar occultation | 2009/10/16                                      | 4.0                                     | 935                                                              | <u>7 – 63 (Equator)</u>  | <u></u> |
| SCISAT                | mid IR            | - 2010/04/17                                    |                                         |                                                                  | <u>6 – 59 km (Polar)</u> | <u></u> |
| TELIS                 | Limb emission     | 2010/01/24                                      | 3v02                                    | 4                                                                | <u>16 – 34 km</u>        | <u></u> |
| Balloon borne         | submm/THz         |                                                 |                                         |                                                                  |                          | <u></u> |

**4.1 Comparison with Aura/MLS**

The Aura satellite has a sun-synchronous orbit with an ascending node at 1:45 PM local time (Waters et al., 2006). The measurements cover latitudes from 82°S to 82°N and provide approximately 3500 vertical profiles each day. We used version 165 4.2 of the Aura/MLS HCl profiles for these comparisons. The Aura/MLS team provided two HCl products one from spectral band 13 (HCl-640-B13) and one from band 14 (HCl-640-B14). The HCl-640-B13 product is available for the pressure region between 100 hPa and 0.32 hPa. The single profile precision of HCl-640-B13 is less than 0.8 ppbv (25%) in the stratosphere, and the estimated accuracy is approximately 0.3 ppbv (10%) (Livesey et al., 2018).

The vertical and horizontal resolutions are 3–5 km and 200–400 km, respectively. The vertical resolution of MLS is of the 170 same order as that of SMILES. We used the recommended parameters “Status,” “Quality,” and “Convergence” for screening the Aura/MLS data based on Livesey et al. (2018). The good profiles were selected using (1) Quality < 1.2, (2) Convergence > 1.05, and (3) Status = Even. The SMILES profiles were linearly interpolated onto the MLS pressure grid for the comparisons.

Figure 5 shows a comparison of the HCl vertical profiles derived from SMILES and Aura/MLS in the SMILES latitude range. The total number of coincident profile pairs was 4356. The HCl profiles from the SMILES measurements agreed with 175 those of MLS within 0.25 ppbv between 20 and 40 km (50–3 hPa), while large biases about 0.4 ppbv were confirmed between 40 and 55 km (3–0.32 hPa). The differences between HCl profiles ~~increases-~~ increase from the stratosphere to the mesosphere. Figure 6 shows the zonal mean absolute differences averaged for 5° latitude bins. The differences did not change with latitude in the altitude region between 35–55 km (7–0.32 hPa). While below 35 km of altitude, several areas of large differences can be identified, especially in the equatorial region.

180 Figure 7 displays more detailed features of the differences between the SMILES and MLS profiles. ~~Panels~~ Panel (A) of Fig. 7 show the averaged HCl vertical profiles of SMILES (blue) and MLS (red), and the absolute difference in each latitude region (40°S–20°S, 20°S–20°N, 20°N–50°N, and 50°N–65°N). ~~Panels~~ Panel (B) show the latitudinal distribution averaged in 5° bins

for SMILES (blue) and MLS (red) at 30, 40, and 50 km. The error bar shows the  $1\sigma$  variability for each latitude grid. In the equatorial regions, the SMILES HCl profiles were 0.5 ppbv larger than those of MLS at below 30 km (10 hPa). ~~There is a possibility that this difference was caused by water vapor. The SMILES HCl profile was retrieved without considering water vapor effect and the influence of the water vapor was thus one of the possible results of the latitudinal difference.~~ On the other hand, the HCl profiles from the SMILES measurements were 0.4 ppbv ~~less~~ lower than those of MLS in all latitude regions at 50 km.

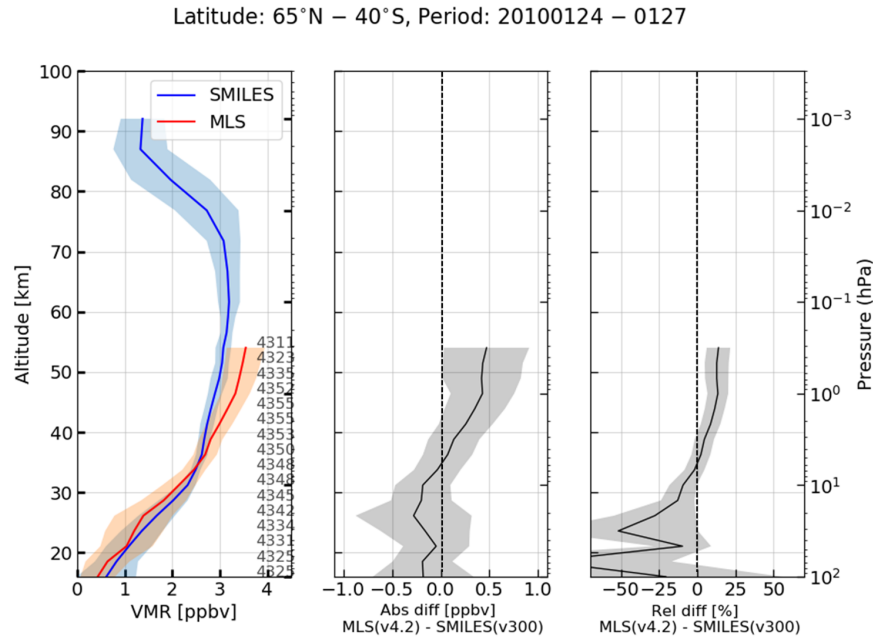

**Figure 5.** Comparison between SMILES and MLS profiles from January 24, 2010 to January 27, 2010. Left: mean HCl VMR values (solid lines) and  $1\sigma$  (shaded areas) for SMILES and MLS. The blue and red lines indicate the SMILES HCl profiles and MLS profiles, respectively. Middle: The absolute difference between the SMILES and MLS profiles calculated using Eq (3). Right: The relative difference between the SMILES and MLS profiles calculated using Eq (4).

## 4.2 Comparison with SCISAT/ACE-FTS

The ACE-FTS is an instrument mounted on the Canadian SCISAT satellite. SCISAT moves along an orbit at a 650 km altitude and is inclined at  $74^\circ$  to the equator (Bernath et al., 2005). The ACE comprises two instruments: the Fourier Transform Spectrometer (ACE-FTS) and the Measurement of Aerosol Extinction in the Stratosphere and Troposphere Retrieved by Occultation (ACE-MAESTRO). The HCl observation has been performed using ACE-FTS. The ACE-FTS observes solar occultation spectra in the infrared spectral region ( $750\text{--}4400\text{ cm}^{-1}$ ) with a high spectral resolution ( $0.02\text{ cm}^{-1}$ ). We used ACE-FTS HCl profiles from the version 4.0 software, which is the latest data version [\(Boone et al., 2020\)](#). The vertical resolution of the

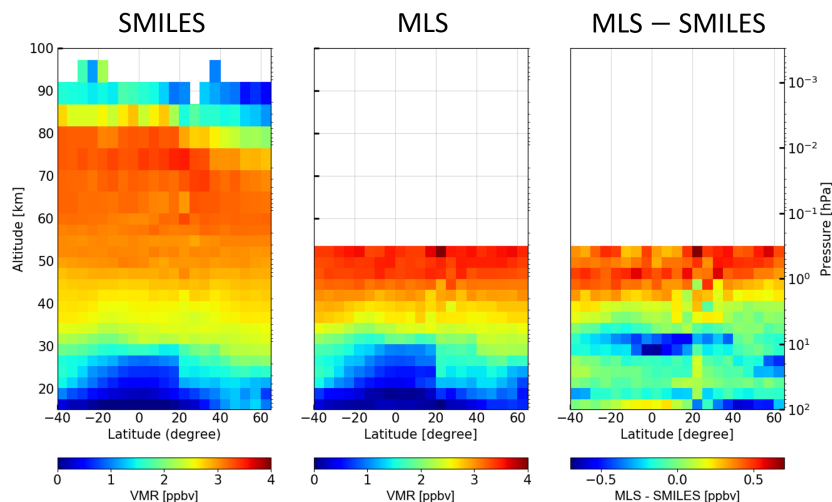

**Figure 6.** Left: SMILES zonal mean HCl profiles versus latitude. Profiles that satisfied coincidence criteria between SMILES and MLS for January 24 – 27, 2010 were used here. Middle: Zonal mean HCl profiles from MLS. Right: The absolute difference of the matched pairs versus latitude.

ACE-FTS HCl retrieval is 3–4 km, and the values from the retrieval grid are interpolated onto the 1-km grid, using a piecewise quadratic method (Bernath et al., 2005). The vertical resolution of ACE-FTS is of the same order as that of SMILES. In this study, we used the data within  $\pm 3$  times the median absolute deviation (3-MAD) from the median to remove significantly large positive and negative biases based on Boone et al. (2019).

Figure 8 presents the comparison of the HCl vertical profiles between SMILES and ACE-FTS in the latitude range of 40°S–65°N. The total coincident data number was 945–935. The SMILES HCl profiles agreed with those of the ACE-FTS by 0.2 ppbv between 20 and 40 km (50–2 hPa), while 0.5 ppbv (15%) less-lower than those of ACE-FTS above 40 km. This negative bias in the SMILES HCl concentration was confirmed as in the case of the MLS–SMILES comparison. The results of the comparison with the ACE-FTS for each latitudinal region are presented in Fig. 9 (A) in a manner similar to Fig. 7 (A). In the tropic-In the tropical region, a large discrepancy was observed at an altitude altitude-of 25 km because of relatively poor sampling number. The HCl profiles observed using the SMILES were about 0.5 ppbv (15%) less than those of ACE-FTS for each latitudinal region above 50 km.

The period of the SMILES H<sup>35</sup>Cl observation (from Oct 16, 2009 to Apr 17, 2010) was covered by the ACE-FTS observation period, while the MLS Band-13 observation period had an overlapped-overlap of only 4 days. We analyzed the difference between SMILES and ACE-FTS for each month and reconfirmed-confirmed the seasonal variation of the bias. Figure 9 (B) shows a seasonal variation of the difference between the SMILES and ACE-FTS profiles in the northern hemisphere (from

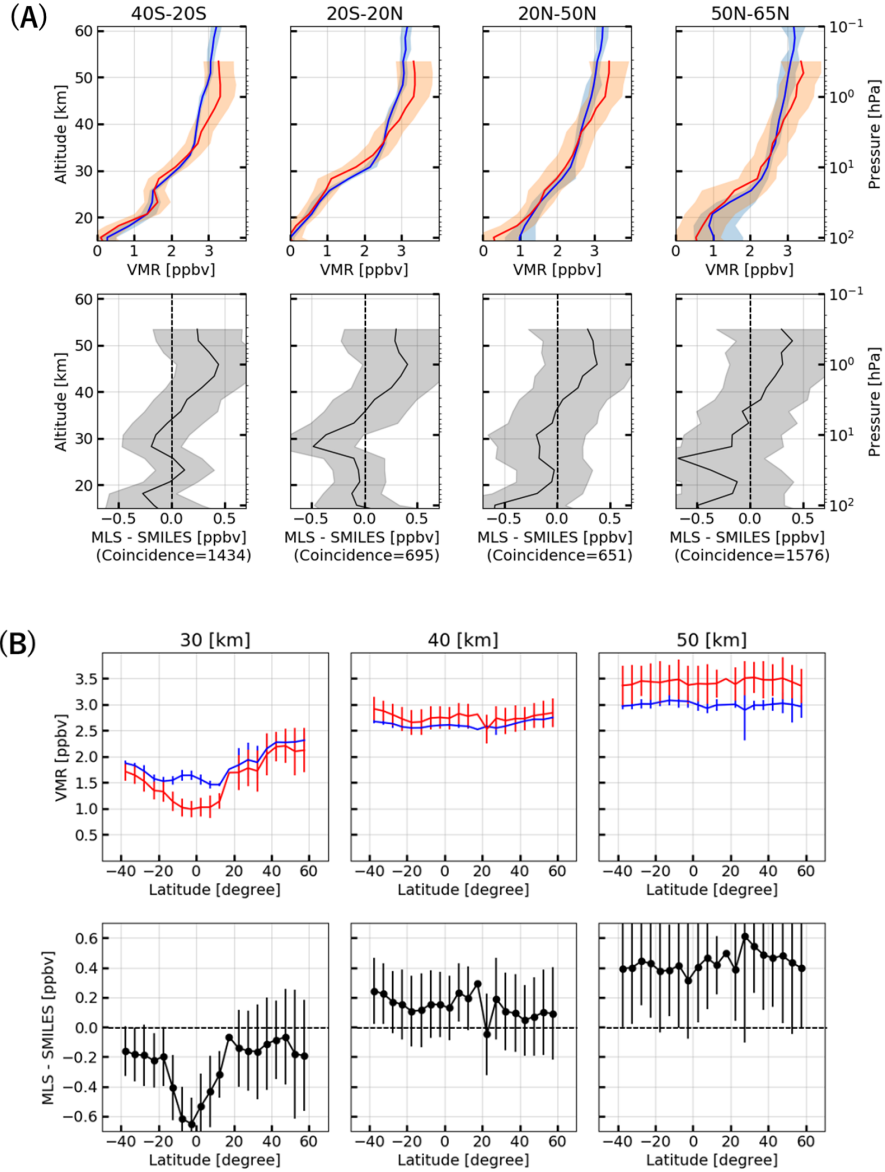

**Figure 7.** (A): Mean HCl profiles, 1  $\sigma$  uncertainty based on variability (shaded region) and the absolute differences for each latitude region. Upper row: The blue and red lines indicate the mean profiles from SMILES and MLS for 40°S-20°S, 20°S-20°N, 20°N-50°N, and 50°N-65°N (left to right panels). Lower row: The absolute difference between the SMILES and MLS profiles calculated using Eq (43) for each latitude region. (B): Latitudinal variation of SMILES and Aura/MLS HCl profiles at three altitude levels. The profiles were averaged for each 5° bin. Upper row: Mean of SMILES (blue) and MLS (red) profiles for each altitude level. The error bars indicate 1  $\sigma$  uncertainties. Lower row: The means and 1  $\sigma$  of the absolute differences are displayed.



30°N–65°N latitude range). The upper panels in Fig. 9 (B) show a mean of the SMILES (blue) and ACE-FTS (redgreen) profiles for each month at three altitude levels. The difference for every month, shown in the lower panels, was represented by the mean for each month at each altitude, and the error-bar showed the  $1\sigma$  standard deviation. No significant seasonal dependence of the difference was observed. The difference of HCl value from these measurements was consequently about 0.5 ppbv at 50 km.

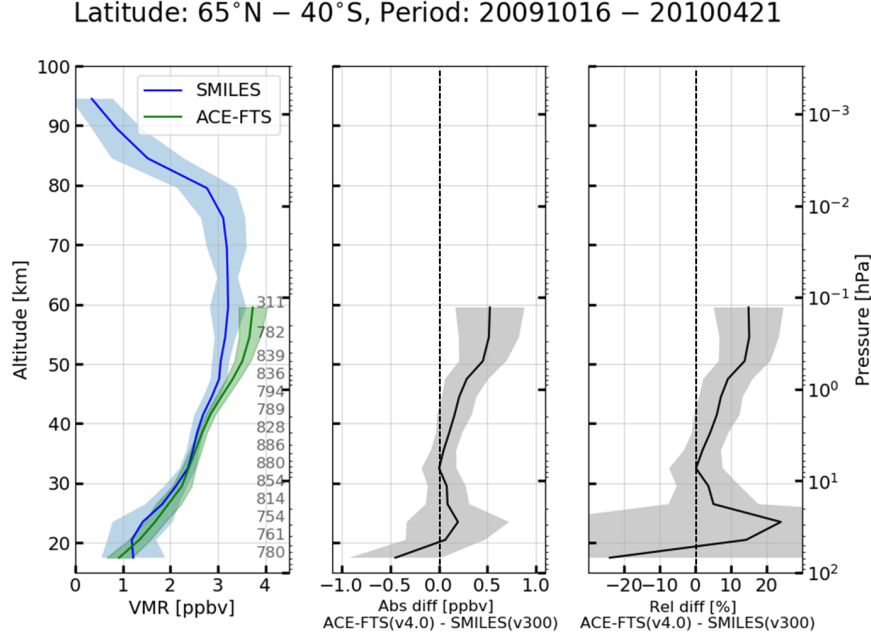

**Figure 8.** Comparison between SMILES and ACE-FTS profiles from October 16, 2009 to April 17, 2010. Left: The mean HCl VMR values (solid lines) and  $1\sigma$  (shaded areas) for SMILES and ACE-FTS. The blue and redgreen lines are the SMILES and ACE-FTS HCl profiles, respectively. Middle: The absolute difference between the SMILES and ACE-FTS profiles calculated using Eq (3). Right: The relative difference between the SMILES and ACE-FTS profiles calculated using Eq (4).

### 4.3 Comparison with balloon-borne instrument TELIS

The TELIS (Birk et al., 2010) is a balloon-borne THz/sub-millimeter-wave spectrometer with superconductive 4K technology similar to that of SMILES. TELIS was one of the instruments used in the balloon observation campaigns for three winters (2009–2011) in Kiruna, Sweden. Limb observations were performed from a flight altitude of 30–35 km, toward the stratosphere and the upper troposphere with 1.5–2 km vertical sampling. TELIS was used to observe  $\text{H}^{37}\text{Cl}$  at the transition frequency of 1873.4 GHz in the 1.8 THz channel (Level-1b version 3v02), which corrected non-linearity problems in the radiometric calibration using a quadratic term for each frequency segment. The details on the TELIS 1.8 THz channel and its L1 data processing are shown in Suttiwong (2010). In this study, we compared two  $\text{H}^{37}\text{Cl}$  profiles obtained by TELIS (observation

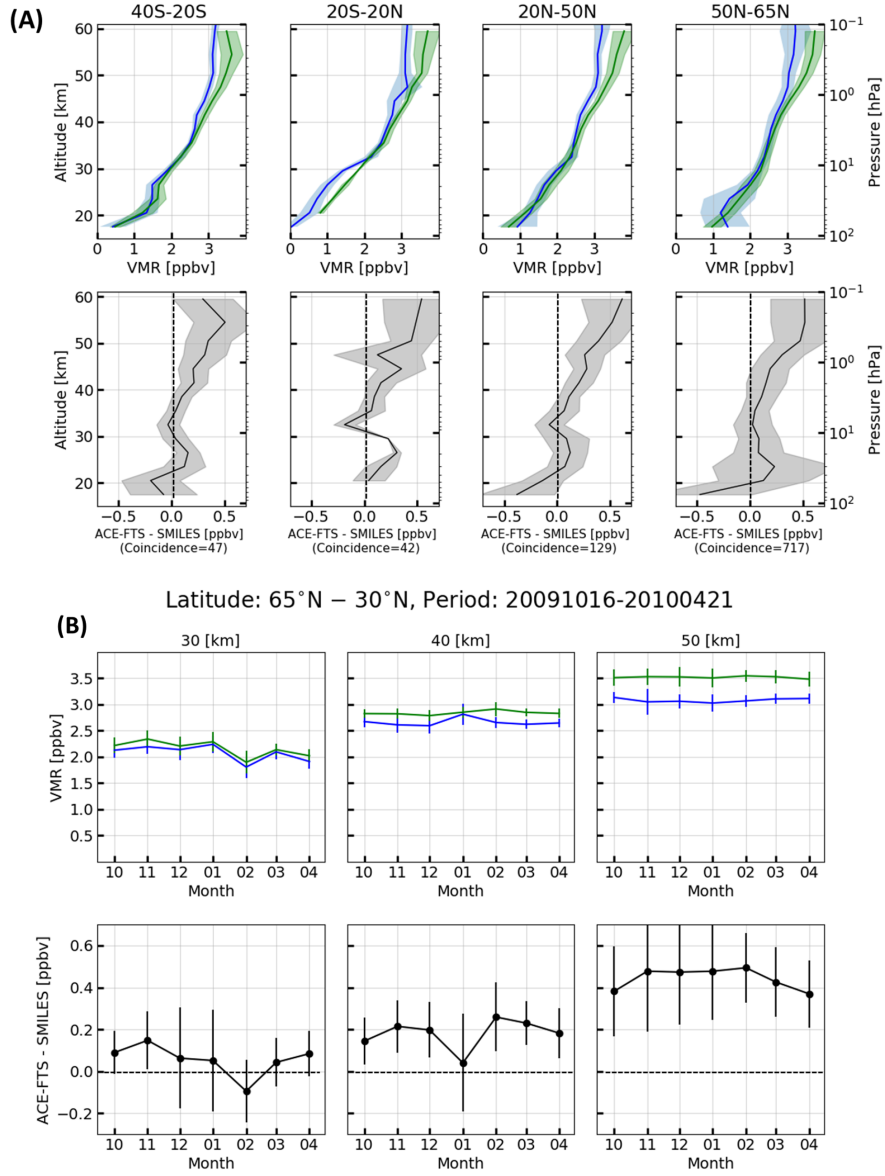

**Figure 9.** Figure-(A): The mean of HCl values, 1  $\sigma$  and the absolute difference for each latitudinal region are shown. Upper row: The blue and red-green lines indicate the SMILES HCl profiles and ACE-FTS profiles for each latitudinal region, 40°S-20°S, 20°S-20°N, 20°N-50°N, and 50°N-65°N from the left side. Lower row: The absolute difference between the SMILES and ACE-FTS profiles calculated using Eq (3) for each latitudinal region. Figure-(B): Seasonal variation in the SMILES and ACE-FTS HCl profiles at three altitude levels. Latitudinal range is 30°N – 65°N. Upper row: Monthly mean of SMILES (blue) and ACE-FTS (red-green) HCl profiles for each altitude level. The error bars correspond the 1  $\sigma$ . Lower row: The mean and 1  $\sigma$  uncertainty of the absolute difference.

225 number 20044 and 21537) with the SMILES profiles (Band-B and identifiers 761 and 762) in terms of geolocation [over Kiruna](#)  
[\(67.8 N° 20.4 E°\)](#) and time on January 24, [2010 over Kiruna, 2010](#). The total error of the  $\text{H}^{37}\text{Cl}$  profile derived from the TELIS  
measurement was estimated to be 0.25–0.5 ppbv, with a vertical resolution of 3 km (Xu et al., 2018).

Figure 10 shows a comparison of the HCl vertical profiles of SMILES and TELIS. The left, middle and right panels show the  
SMILES and TELIS HCl vertical profiles, their absolute difference, and their relative difference, respectively. We converted  
230 the  $\text{H}^{37}\text{Cl}$  amount to HCl using the natural isotopic abundance ( $\text{H}^{37}\text{Cl}/\text{HCl} = 0.2424$ ). The SMILES and TELIS HCl profiles  
agreed well, within 0.5 ppbv from 17 km to 34 km. A depletion in the HCl profile was observed below 25 km in both the  
SMILES and TELIS observations. This result is considered to have been caused by chlorine activation in the polar vortex  
[\(Webster et al., 1993\)](#). [\(Webster et al., 1993; Wegner et al., 2016\)](#). Both the SMILES and TELIS profiles agree well in general,  
but the TELIS profiles are larger than the SMILES profiles above 32 km (8 hPa). The  $\text{H}^{37}\text{Cl}$  line is still rather strong at higher  
235 altitudes, and the dominant error source of the TELIS data stems from the non-linearity in the calibration process, which shows  
that even a small uncertainty may result in significant errors in the retrieval [\(Xu et al., 2018\)](#).

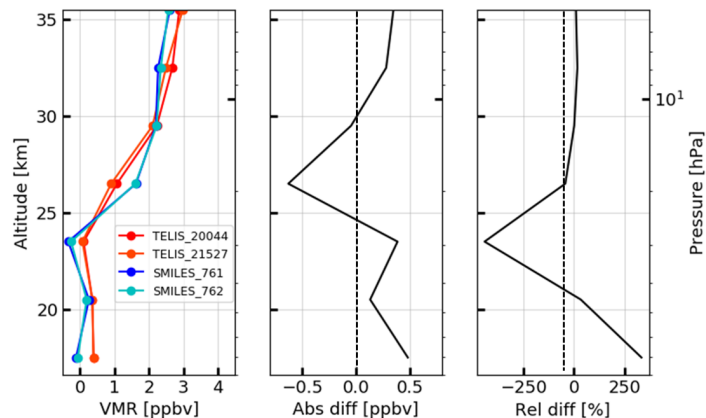

**Figure 10.** Differences between SMILES and TELIS HCl observations are shown for January 24, 2010. Two of the SMILES observations were taken from closer points, where the latitude, longitude, and SZA were 64.3°N, 30.6°E, and 84.6°SZA and 64.8°N, 38.2°E, 86.2° SZA, respectively. Left: Each profile obtained by SMILES and TELIS instruments. Middle: The absolute difference between the SMILES and TELIS profiles calculated using Eq (3). Right: The relative difference between the SMILES and TELIS profiles calculated using Eq (4).

**Table 4.** Summary of the HCl comparison study between SMILES and the other instruments

| Altitude [km] | $\Delta x_{\text{MLS}}$ [ppbv] | $\Delta x_{\text{ACE-FTS}}$ [ppbv] | $\Delta x_{\text{TELIS}}$ [ppbv] |
|---------------|--------------------------------|------------------------------------|----------------------------------|
| 60            | —                              | 0.5                                | —                                |
| 50            | 0.4                            | 0.4                                | —                                |
| 40            | 0.2                            | 0.15                               | —                                |
| 30            | -0.2                           | 0.05                               | 0.4 <u>a</u>                     |
| 20            | -0.1                           | -0.02                              | 0.5 <u>a</u>                     |

## 5 Theoretical error analysis

We have evaluated the total error in the HCl vertical profiles observed by SMILES, and we discussed the cause of the bias observed in the comparison study, see Sect. 4.

### 240 5.1 Estimation of total error

We employed a perturbation method to estimate the total error of the SMILES HCl profile. The details of the perturbation method of the SMILES error analysis have been described in Kasai et al. (2006) and Sato et al. (2014), Kasai et al. (2013), and Sato et al. (2012) for ozone isotopes, ozone, and ClO, respectively. We assumed an averaged HCl profile within the coincidence with MLS in the south mid-latitude region (20°S – 40°S) as a reference. The total error ( $\mathbf{E}_{\text{total}}$ ) for each altitude  
 245 grid was calculated by

$$\mathbf{E}_{\text{total}}[i] = \sqrt{\mathbf{E}_{\text{noise}}[i]^2 + \mathbf{E}_{\text{smooth}}[i]^2 + \mathbf{E}_{\text{param}}[i]^2}, \quad (5)$$

where  $\mathbf{E}_{\text{noise}}$  is the error due to spectrum noise,  $\mathbf{E}_{\text{smooth}}$  is the smoothing error, and  $\mathbf{E}_{\text{param}}$  is the model parameter error.  $\mathbf{E}_{\text{noise}}$  and  $\mathbf{E}_{\text{smooth}}$  were calculated by

$$\mathbf{E}_{\text{noise}}[i] = \sqrt{\mathbf{S}_{\text{noise}}[i, i]} \quad (6)$$

$$250 \quad \mathbf{S}_{\text{noise}} = \mathbf{D} \mathbf{S}_{\epsilon} \mathbf{D}^T \quad (7)$$

and

$$\mathbf{E}_{\text{smooth}}[i] = \sqrt{\mathbf{S}_{\text{smooth}}[i, i]} \quad (8)$$

$$\mathbf{S}_{\text{smooth}} = (\mathbf{U} - \mathbf{A}) \mathbf{S}_a (\mathbf{U} - \mathbf{A})^T \quad (9)$$

where  $\mathbf{D}$  is the contribution function, and  $\mathbf{U}$  is the unit matrix.

255 We calculated the errors due to the uncertainties of the spectroscopic parameters and the instrument functions to calculate  $\mathbf{E}_{\text{param}}$ . The error  $\mathbf{E}_{\text{param}}$  was calculated by

$$\mathbf{E}_{\text{param}} = I(\mathbf{y}_{\text{ref}}, \mathbf{b}_0 + \Delta \mathbf{b}_0) - I(\mathbf{y}_{\text{ref}}, \mathbf{b}_0) \quad (10)$$

where  $I$  is the inversion function and  $\mathbf{b}_0$  is the vector of model parameters and  $\Delta \mathbf{b}_0$  is the uncertainty on model parameters. The  $\mathbf{y}_{\text{ref}}$  is the reference spectrum calculated using the reference profile. The details of the estimation of the total error are described in Sato et al. (2012). The error sources and perturbations for the model parameter used in this study are summarized in Table 5. These parameters and perturbation value-values are based on Sato et al. (2014). The uncertainties of the spectroscopic parameters of the O<sub>3</sub> transition 625.37 GHz were included to estimate the error due to the interference from the line shape of O<sub>3</sub> spectrum. The calibration error was not considered in this study because the latest L1b data version 008 was used and Sato et al. (2014) reported that the error due to the spectrum calibration in this L1b data was insignificant.

**Table 5.** Error sources and their perturbation values for this study.

| Error source                                                                                      | Uncertainty |
|---------------------------------------------------------------------------------------------------|-------------|
| Spectroscopic parameters of the H <sup>35</sup> Cl transition at 625.92 GHz                       |             |
| Line intensity                                                                                    | 1 %         |
| Air-pressure broadening coefficient ( $\gamma_{\text{air}}$ )                                     | 3 %         |
| Temperature dependence of $\gamma_{\text{air}}$ ( $n_{\text{air}}$ )                              | 10 %        |
| Spectroscopic parameters of the O <sub>3</sub> transition at 625.37 GHz                           |             |
| $\gamma_{\text{air}}$ of the O <sub>3</sub> transition ( $\gamma_{\text{air}}$ (O <sub>3</sub> )) | 3 %         |
| $n_{\text{air}}$ of the O <sub>3</sub> transition ( $n_{\text{air}}$ (O <sub>3</sub> ))           | 10 %        |
| Instruments                                                                                       |             |
| Antenna beam pattern (Antenna)                                                                    | 2 %         |
| AOS response function (AOS)                                                                       | 5 %         |

The perturbation value was based on Sato et al. (2014).

The estimated errors in the SMILES HCl v300 product are presented in Fig. 11. The total model parameter error, labeled as “Param”, was calculated by a root-sum-square (RSS) of all model parameter errors. The three spectroscopic parameters, line intensity, air-pressure broadening coefficient ( $\gamma_{\text{air}}$ ), and its temperature dependence ( $n_{\text{air}}$ ) were dominant error sources below 30 km. The  $\gamma_{\text{air}}$  was a major error source between the altitude region of 30 and 60 -km, which was about 0.9-0.09 ppbv ( $\sim 3\%$ ) at 50 km. At altitudes of 60–90 km, the largest error source was the AOS response function, and its peak value reached 0.38 ppbv ( $\sim 12\%$ ) at 70 km.

## 5.2 Discussion: Cause of the negative bias of the SMILES HCl vertical profile

In Sect. 5.2, we discuss the cause of the negative bias of the SMILES HCl vertical profile, i.e., approximately 10 % less than those of Aura/MLS and ACE-FTS especially at the altitudes above-between 40 – 60 km. Such a large bias could not be explained by the total error estimated by the perturbation method described in Sect. 5.1. We further investigated the cause of this bias by difference of temperature profile used in the retrieval calculation. The temperature profile used for the retrieval procedure of SMILES was smaller-lower than those of MLS and ACE-FTS particularly in the upper stratosphere, mesosphere, and lower thermosphere and mesosphere. We estimated the difference of the retrieved HCl vertical profile,  $\Delta x$ , due to the difference of

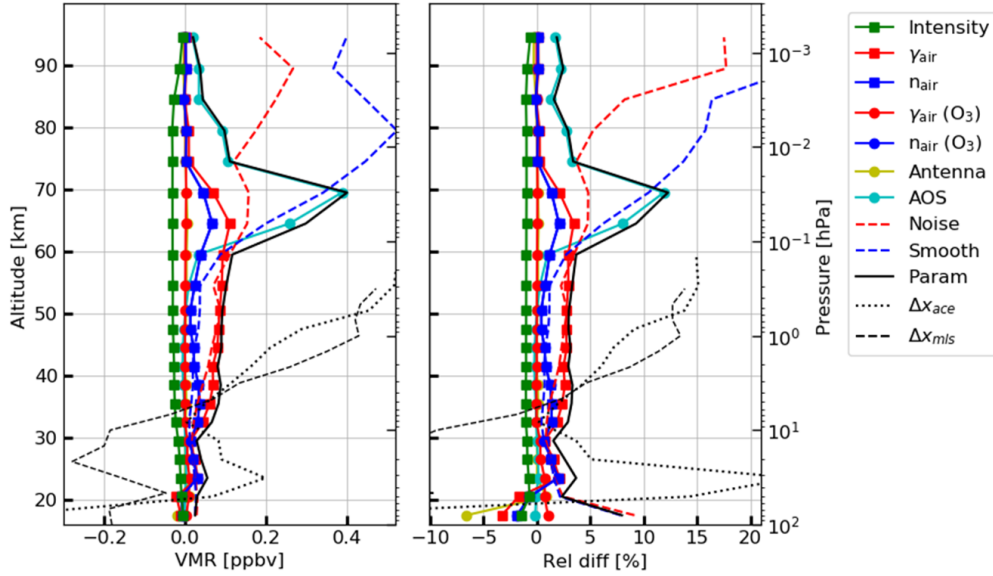

**Figure 11.** Summary of the errors for a single scan observation. The left and right panels, respectively, show the absolute difference and relative difference, which were estimated using the perturbation method. The green marker indicates an error due to the uncertainty in line intensity (“Intensity”). The red and blue square show errors for the air broadening coefficient (“ $\gamma_{\text{air}}$ ”), and its temperature dependence ( $n_{\text{air}}$ ) of the  $\text{H}^{35}\text{Cl}$  transition. The red and blue circles show errors for “ $\gamma_{\text{air}}$ ” and  $n_{\text{air}}$  of the  $\text{O}_3$  transition (“ $\gamma_{\text{air}}(\text{O}_3)$ ”, “ $n_{\text{air}}(\text{O}_3)$ ”). The yellow and cyan symbols show errors for the antenna beam pattern (“Antenna”), and the AOS response function (“AOS”). The red and blue dashed lines indicate  $E_{\text{noise}}$  (“Noise”) and  $E_{\text{smooth}}$  (“Smooth”), respectively. The black solid lines (“Param”) indicate the total model parameter errors, obtained from the RSS of all the estimated parameter errors. The black dotted and dashed lines indicate the difference between SMILES and MLS, and between SMILES and ACE-FTS.

the temperature profile,  $\Delta T$ , as follows.

$$\Delta x = DK_T \Delta T, \quad D = \frac{\partial x}{\partial y}, \quad K_T = \frac{\partial y}{\partial T} \quad (11)$$

280 The jacobian  $K_T$  indicates the sensitivity of the spectral brightness temperature ( $y$ ) with reference to changes of the temperature ( $T$ ). Here we synthesized the jacobian with a perturbation of 0.5 K. Figure 12 (A) shows the jacobian as a function of the tangent height. Here the minimum value of the column of the  $K_T$  matrix is plotted. ~~Negative value of the jacobian~~ A negative jacobian value means that higher ~~temperature synthesizes lower smaller temperatures induce a lower~~ brightness temperature spectrum, thus ~~increases increasing~~ the HCl abundance in the retrieval ~~calculation~~ to compensate for ~~the underestimation of~~   
 285 ~~the synthesized spectrum due to the temperature higher than the true value.~~

~~The vertical profile of temperature used for the retrieval procedure of this underestimation. The temperature profiles used in the retrievals by~~ SMILES, MLS, and ACE-FTS and their differences, MLS–SMILES, ACE-FTS–SMILES, are shown in

the panels (B) and (C) in Fig. 12, respectively. The vertical profile of temperature of SMILES is approximately 5-10 K smaller lower than those of both MLS and ACE-FTS at the altitude 50–70 km. The panel (D) for altitudes between 50 and 60 km. The a priori temperature profile used in the SMILES retrieval procedure is based on the GEOS-5 profile in the stratosphere and MLS retrieved profile above the mesosphere. The altitude limit of the MLS temperature profile is 0.001 hPa, with a vertical resolution of 6–14 km and a precision of 1.2–3.6 K per profile. MLS used GEOS-5 up to 1 hPa as with SMILES. For pressures smaller than 1 hPa, the COSPAR International Reference Atmosphere (CIRA-86) is used as a priori temperature information (with a loose constraint) in the MLS retrieval procedure (Schwartz et al., 2008). The altitude range and vertical resolution of the CIRA-86 profile are ground to 120 km and 2 km, respectively (Fleming et al., 1990). The temperature value retrieved by MLS is 10 K lower than the a priori profile on average in some areas for pressure values smaller than 1 hPa (Schwartz et al., 2008), based on earlier version validation studies (Schwartz et al., 2008). The ACE-FTS retrieval procedure uses the retrieved temperature profile as the a priori between 18–125 km. The vertical resolution of ACE-FTS retrieved temperature is 3–4 km. The temperature values retrieved by ACE-FTS are less than 10 K larger than the MLS derived temperatures. (Schwartz et al., 2008). These types of difference are also seen in the comparison results performed here.

Panel (D) in Figure 12 shows the  $\Delta x$  due to the difference of the temperature profile. The difference of the temperature profile caused increase HCl abundance by This temperature difference caused an increase in SMILES HCl of 0.12 and 0.20 ppbv at about 55 km for ppbv at 50–60 km for the MLS and ACE-FTS comparisons, respectively.

In the comparison study, see Sect. 4, we confirmed the negative bias in the SMILES HCl vertical profile of  $0.4 \pm 0.38$  and  $0.5 \pm 0.28$  ppbv at 55 between 40–60 km for MLS and ACE-FTS, respectively. We estimated the total error by the perturbation method and investigated the temperature profile used in the retrieval calculation, in order to investigate the cause of this negative bias. The largest error sources were the uncertainties in  $\gamma_{\text{air}}$  of the  $\text{H}^{35}\text{Cl}$  transition and temperature profile used in retrieval calculation the temperature profiles used in the retrievals. We assumed the a 3 % uncertainty in  $\gamma_{\text{air}}$  and it might cause approximately which could lead to a  $-0.1$  ppbv negative bias at 55 bias in the 40–60 km. The difference in region. In addition to the error due to the  $\gamma_{\text{air}}$  coefficients, the effect of temperature differences should be taken into account at altitudes above 50 km. The gradual increase in bias is caused by the difference in altitude at which these two errors become more pronounced. The difference in temperature profiles used in the retrieval between SMILES and ACE-FTS caused approximately a negative bias of about 0.2 ppbv negative bias. Totally ppbv at 50–60 km. In summary, 0.3 in 0.5 ppbv (60 %) negative bias between SMILES and ACE-FTS was can be explained by the uncertainty in  $\gamma_{\text{air}}$  and temperature profile the temperature profiles used in the retrieval SMILES retrievals. The effect of  $\gamma_{\text{air}}$  error on the negative bias between SMILES and MLS is less than that of SMILES and ACE-FTS, since the SMILES and MLS observed the same  $\text{H}^{35}\text{Cl}$  transition lines and the values of the  $\gamma_{\text{air}}$  are consistent within approximately 1 % (3.39 MHz/Torr for SMILES and 3.42 MHz/Torr for MLS (Drouin, 2004)). The A 1 % difference of in  $\gamma_{\text{air}}$  might cause the HCl abundance increase to increase by about 0.03 ppbv at 55 km according to our error analysis with a perturbation method. The About 40 % (0.15 in out of 0.4 ppbv (approximately 40 %)) of the negative bias between SMILES and MLS was explained. Conclusively can be explained. Therefore, our theoretical error analysis showed shows that the SMILES HCl a had has a negative bias of 0.2–0.25 at most 0.25 ppbv at 55 between 40 and 60 km which were

consistent with the difference from the MLS and; remaining difference between SMILES and MLS or ACE-FTS within the  $1\sigma$  standard deviation, can be explained by the standard deviation in the comparison result.

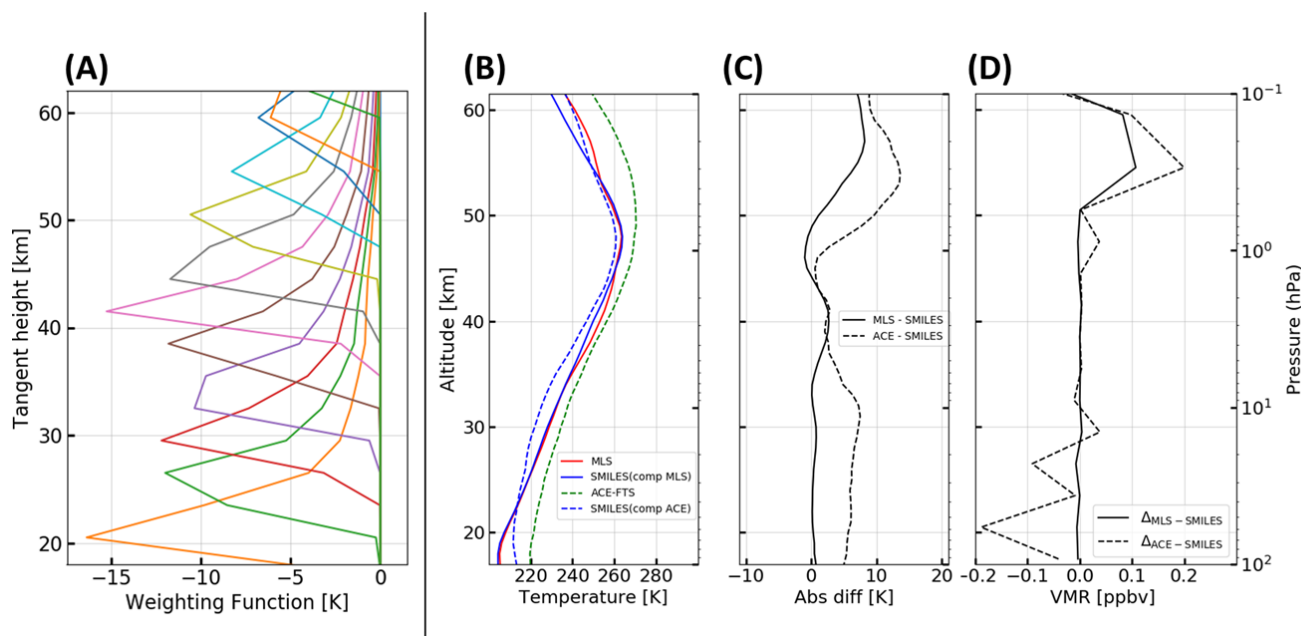

**Figure 12.** (A) The dashed lines represent the jacobian for the temperature calculated using the mean profile from the SMILES winter mid-latitude region (20°S–40°S). The units of the jacobian (x-axis) are Kelvin. (B) Temperature profile of each instruments. The blue and red solid lines indicate the mean SMILES and MLS temperature profiles within the coincidence criteria used for the HCl comparisons. The blue and red-dash-green dashed lines indicate the SMILES and ACE-FTS temperature profiles for the same coincidence criteria. (C) The absolute difference of temperature profiles between SMILES and other instruments calculated using Eq (3) (D) The difference in HCl profiles calculated using Eq (11).

## 6 Conclusion

325 In this study, the HCl vertical profile in a wide range from the upper troposphere to the lower thermosphere was reported for the first time using the SMILES NICT Level 2 data product v300. The HCl vertical-profile showed-distribution shows an increase with the-altitude-increased-altitude with a maximum below the stratopause (~45 km), approximately constant values between the stratopause and the upper mesosphere (~80 km), and decreased-with-the-altitude-increased-a decrease with altitude from the mesopause to the lower thermosphere (~100 km). In the lower and middle stratosphere, HCl is generated by the reaction  
 330 of Cl with CH<sub>4</sub> and HO<sub>2</sub> and transported by circulation (e.g. Brewer-Dobson circulation). The HCl abundance is balanced by production (Cl + HO<sub>2</sub> → HCl + O<sub>2</sub>) and loss (HCl + OH → HCl + H<sub>2</sub>O, HCl + hν → H + Cl) in the upper stratosphere and the mesosphere. Above the mesopause, the photodissociation becomes the dominant reaction and the HCl abundance



decreases. This behavior was reproduced by the SD-WACCM model, and the SMILES HCl vertical profile agreed well with the SD-WACCM model within  $\pm 0.1$  ppbv at altitude for altitudes between 30 to and 70 km.

335 The data quality of the SMILES HCl vertical profile was quantified by ~~the comparison study with other instrument measurements and~~  
~~the comparisons versus other measurements, and supported by a~~ theoretical error analysis. We compared the SMILES HCl  
vertical profiles with well validated data of two satellite instruments, Aura/MLS and ACE-FTS, as well as a balloon-borne  
instrument, TELIS, at their temporal-spatial ~~coincidence~~, coincidences. The SMILES HCl profiles at 20–40 km showed good  
agreements, within less than  $0.25 \pm 0.3$  ( $1\sigma$ ) and  $0.20 \pm 0.2$  ( $1\sigma$ ) ppbv ~~with the~~, versus MLS and ACE-FTS, respectively. The  
340 comparison with the TELIS in the polar winter region at 20–34 km showed similar behavior ~~within the difference of with~~  
differences within 0.3 ppbv, which is the same order of magnitude as the systematic error of the TELIS data. ~~The A~~ negative  
bias ( $< 0.5$  ppbv) of the SMILES HCl profiles from 40 to 60 km altitudes was observed ~~compared to the in comparisons versus~~  
MLS and ACE-FTS ~~HCl profiles~~.

We estimated the total error for SMILES HCl based on the perturbation method and ~~error due to the uncertainty in the~~  
345 ~~atmospheric temperature profile considering the uncertainties in atmospheric temperature profiles~~ used in the ~~retrieval calculation~~ retrievals.  
The dominant contributions to the systematic errors were from the air broadening parameter (0.09 ppbv) and the AOS response  
function (0.38 ppbv) at ~~30–60~~ 30 – 60 km and 60–100 km altitudes, respectively. The uncertainty in the temperature profile  
used in the retrieval calculation caused ~~the a~~ negative bias of 0.12 ~~and to~~ 0.20 ppbv ~~at about 55~~ between 50 – 60 km, which  
was 30% and 40% of the HCl abundance difference between SMILES and MLS, and SMILES and ACE-FTS, respectively.  
350 The uncertainties of the air broadening parameter and the temperature profile ~~were capable of totally contributing up to are~~  
capable of contributing a total of 40 – 50 % of the ~~negative bias in 50–60~~ SMILES HCl negative biases at 50 – 60 km altitudes.  
~~Totally. In summary~~, our theoretical error analysis showed that the ~~SMILES HCl had~~ HCl profiles had a negative bias of 0.20  
~~–0.25– 0.25~~ ppbv at ~~55~~ 50 – 60 km ~~which were~~, which is consistent with the ~~difference from the observed differences versus~~  
MLS and ACE-FTS ~~within the profiles within~~ 1  $\sigma$  standard deviation. The spectroscopic parameters of the HCl transitions and  
355 the temperature profile above ~~stratosphere the stratopause~~ are key parameters for ~~further improvement of retrieval algorithm~~.  
potential improvements in the SMILES retrieval algorithms.

The observation of HCl abundances in the upper atmosphere is important to investigate the long-term ~~quantitative estimations~~  
~~of the~~ total budget of anthropogenic chlorine in the Earth's atmosphere. Further observations and model studies ~~regarding HCl~~  
~~abundance including upper atmosphere~~ are needed to ~~understand the source and sink~~ better understand the sources and sinks,  
360 transport processes, and chemical reactions related to HCl.

*Data availability.* The SMILES data is available at <http://smiles.nict.go.jp/pub/data/index.html>.

The MLS data is available at <https://disc.gsfc.nasa.gov/datasets?page=1&keywords=AURA%20MLS> or see <https://mls.jpl.nasa.gov/data/>

The ACE-FTS data is available at [http://www.ace.uwaterloo.ca/instruments\\_acefts.php](http://www.ace.uwaterloo.ca/instruments_acefts.php)

The details on the TELIS 1.8 THz channel and its L1 data processing are shown in <https://elib.dlr.de/66749/> “Development and characteri-  
365 zation of the balloon borne instrument TELIS (TERahertz and submillimeter LIMb Sounder): 1.8 THz receiver Suttiwong, Nopporn (2010)”

and/or <https://elib.dlr.de/97249/> "Inversion for Limb Infrared Atmospheric Sounding Xu, Jian (2015)"

The WACCM data is available at <https://www2.aom.ucar.edu/gcm/waccm>

*Author contributions.* SN designed the study and performed the analysis. YK designed the study and provided the SMILES data. TOS provided the code for the error analysis and contributed to data analysis and interpretation. TY, TF, and KK contributed to the data analysis and reviewed the manuscript. LF, NJL, KAW, JX, and FS provided MLS, ACE-FTS, and TELIS information and knowledge of HCl in the atmosphere and helped review the manuscript. YJO and VL performed and provided the WACCM simulations, and helped review the manuscript.. NK and TM supervised writing of and reviewed the manuscript.

*Competing interests.* The authors declare that no competing interests are present.

*Acknowledgements.* The JEM/SMILES mission is a joint project of the Japan Aerospace Exploration Agency and the National Institute of Information and Communications Technology. The authors wish to acknowledge the contributions made by their colleagues at JAXA and NICT for managing and supporting the SMILES mission. The authors also thank K. Muranaga (Systems Engineering Consultants Co., Ltd.) and J. Moller (Molflow Co., Ltd.) for supporting the data processing in the SMILES NICT Level2 product. YK is supported by a Funding Program for Next Generation World-Leading Researchers (NEXT Program) (No. GR101). Work at the Jet Propulsion Laboratory, California Institute of Technology, was performed under a contract with the National Aeronautics and Space Administration. The Atmospheric Chemistry Experiment (ACE), also known as SCISAT, is a Canadian-led mission mainly supported by the Canadian Space Agency.

## References

- Baron, P., Urban, J., Sagawa, H., Möller, J., Murtagh, D. P., Mendrok, J., Dupuy, E., Sato, T. O., Ochiai, S., Suzuki, K., Manabe, T., Nishibori, T., Kikuchi, K., Sato, R., Takayanagi, M., Murayama, Y., Shiotani, M., and Kasai, Y.: The Level 2 research product algorithms for the Superconducting Submillimeter-Wave Limb-Emission Sounder (SMILES), *Atmospheric Measurement Techniques*, 4, 2105–2124, <https://doi.org/10.5194/amt-4-2105-2011>, <https://www.atmos-meas-tech.net/4/2105/2011/>, 2011.
- 385 Berglund, M. and Wieser, M. E.: Isotopic compositions of the elements 2009 (IUPAC Technical Report), *Pure and Applied Chemistry*, 83, 397 – 410, <https://doi.org/https://doi.org/10.1351/PAC-REP-10-06-02>, <https://www.degruyter.com/view/journals/pac/83/2/article-p397.xml>, 2011.
- Bernath, P. F., McElroy, C. T., Abrams, M. C., Boone, C., Butler, M., Camy-Peyret, C., Carleer, M., Clerbaux, C., Coheur, P., and Colin, R.: Atmospheric chemistry experiment (ACE): mission overview, *Geophys. Res. Lett.*, 32, L15S01, <https://doi.org/10.1029/2005GL022386>, 2005.
- 390 Birk, M., Wagner, G., Lange, G., Lange, A., Ellison, B., Harman, M., Murk, A., Oelhaf, H., Maucher, G., and Sartorius, C.: TELIS: TERAhertz and subMMW Limb Sounder – Project summary after first successful flight, pp. 195–200, 2010.
- Boone, C., Jones, S., and Bernath, P.: Data usage guide and file format description for ACE-FTS level 2 data version 4.0 ASCII format, Tech. rep., Atmospheric Chemistry Experiment Science Operations Center, [https://database.scisat.ca/level2/ace\\_v4.0/ACE-SOC-0033-ACE-FTS\\_ascii\\_data\\_usage\\_and\\_fileformat\\_for\\_v4.0.pdf](https://database.scisat.ca/level2/ace_v4.0/ACE-SOC-0033-ACE-FTS_ascii_data_usage_and_fileformat_for_v4.0.pdf), 2019.
- 395 Boone, C., Bernath, P., Cok, D., Jones, S., and Steffen, J.: Version 4 retrievals for the atmospheric chemistry experiment Fourier transform spectrometer (ACE-FTS) and imagers, *Journal of Quantitative Spectroscopy and Radiative Transfer*, 247, 106939, <https://doi.org/https://doi.org/10.1016/j.jqsrt.2020.106939>, <http://www.sciencedirect.com/science/article/pii/S0022407319305916>, 2020.
- 400 Brasseur, G. P. and Solomon, S.: *Aeronomy of the Middle Atmosphere: Chemistry and Physics of the Stratosphere and Mesosphere.*, Springer, 2005.
- Cazzoli, G. and Puzzarini, C.: Hyperfine structure of the  $J=1 \leftarrow 0$  transition of (HCl)-Cl-35 and (HCl)-Cl-37: improved ground state parameters, *Journal of Molecular Spectroscopy*, 226, 161–168, <https://doi.org/10.1016/j.jms.2004.03.020>, 2004.
- Drouin, B. J.: Temperature dependent pressure-induced lineshape of the HCl  $J=1 \leftarrow 0$  rotational transition in nitrogen and oxygen, *Journal of Quantitative Spectroscopy and Radiative Transfer*, 83, 321 – 331, [https://doi.org/https://doi.org/10.1016/S0022-4073\(02\)00360-6](https://doi.org/https://doi.org/10.1016/S0022-4073(02)00360-6), <http://www.sciencedirect.com/science/article/pii/S0022407302003606>, 2004.
- 405 Drouin, B. J.: Temperature dependent pressure-induced lineshape of the HCl  $J=1 \leftarrow 0$  rotational transition in nitrogen and oxygen, *Journal of Quantitative Spectroscopy and Radiative Transfer*, 83, 321 – 331, [https://doi.org/https://doi.org/10.1016/S0022-4073\(02\)00360-6](https://doi.org/https://doi.org/10.1016/S0022-4073(02)00360-6), <http://www.sciencedirect.com/science/article/pii/S0022407302003606>, 2004.
- Fleming, E. L., Chandra, S., Barnett, J., and Corney, M.: Zonal mean temperature, pressure, zonal wind and geopotential height as functions of latitude, *Advances in Space Research*, 10, 11 – 59, [https://doi.org/https://doi.org/10.1016/0273-1177\(90\)90386-E](https://doi.org/https://doi.org/10.1016/0273-1177(90)90386-E), <http://www.sciencedirect.com/science/article/pii/027311779090386E>, 1990.
- 410 Froidevaux, L., Jiang, Y. B., Lambert, A., Livesey, N. J., Read, W. G., Waters, J. W., Fuller, R. A., Marcy, T. P., Popp, P. J., Gao, R. S., Fahey, D. W., Jucks, K. W., Stachnik, R. A., Toon, G. C., Christensen, L. E., Webster, C. R., Bernath, P. F., Boone, C. D., Walker, K. A., Pumphrey, H. C., Harwood, R. S., Manney, G. L., Schwartz, M. J., Daffer, W. H., Drouin, B. J., Cofield, R. E., Cuddy, D. T., Jarnot, R. F., Knosp, B. W., Perun, V. S., Snyder, W. V., Stek, P. C., Thurstans, R. P., and Wagner, P. A.: Validation of Aura Microwave Limb Sounder HCl measurements, *Journal of Geophysical Research: Atmospheres*, 113, <https://doi.org/10.1029/2007JD009025>, <https://agupubs.onlinelibrary.wiley.com/doi/abs/10.1029/2007JD009025>, 2008.
- 415 Kasai, Y., Sagawa, H., Kreyling, D., Dupuy, E., Baron, P., Mendrok, J., Suzuki, K., Sato, T. O., Nishibori, T., Mizobuchi, S., Kikuchi, K., Manabe, T., Ozeki, H., Sugita, T., Fujiwara, M., Irimajiri, Y., Walker, K. A., Bernath, P. F., Boone, C., Stiller, G., von Clarmann, T.,

- Orphal, J., Urban, J., Murtagh, D., Llewellyn, E. J., Degenstein, D., Bourassa, A. E., Lloyd, N. D., Froidevaux, L., Birk, M., Wagner, G., Schreier, F., Xu, J., Vogt, P., Trautmann, T., and Yasui, M.: Validation of stratospheric and mesospheric ozone observed by SMILES from International Space Station, *Atmospheric Measurement Techniques*, 6, 2311–2338, <https://doi.org/10.5194/amt-6-2311-2013>, <https://www.atmos-meas-tech.net/6/2311/2013/>, 2013.
- Kasai, Y. J., Urban, J., Takahashi, C., Hoshino, S., Takahashi, K., Inatani, J., Shiotani, M., and Masuko, H.: Stratospheric ozone isotope enrichment studied by submillimeter wave heterodyne radiometry: the observation capabilities of SMILES, *IEEE Transactions on Geoscience and Remote Sensing*, 44, 676–693, <https://doi.org/10.1109/TGRS.2005.861754>, 2006.
- Kikuchi, K.-i., Nishibori, T., Ochiai, S., Ozeki, H., Irimajiri, Y., Kasai, Y., Koike, M., Manabe, T., Mizukoshi, K., Murayama, Y., Naga-  
hama, T., Sano, T., Sato, R., Seta, M., Takahashi, C., Takayanagi, M., Masuko, H., Inatani, J., Suzuki, M., and Shiotani, M.: Overview  
and early results of the Superconducting Submillimeter-Wave Limb-Emission Sounder (SMILES), *J. Geophys. Res.*, 115, D23306,  
<https://doi.org/10.1029/2010JD014379>, 2010.
- Kreyling, D., Sagawa, H., Wohltmann, I., Lehmann, R., and Kasai, Y.: SMILES zonal and diurnal variation climatology of stratospheric and  
mesospheric trace gasses: O<sub>3</sub>, HCl, HNO<sub>3</sub>, ClO, BrO, HOCl, HO<sub>2</sub>, and temperature, *Journal of Geophysical Research: Atmospheres*,  
118, 11,888–11,903, <https://doi.org/10.1002/2012JD019420>, <http://dx.doi.org/10.1002/2012JD019420>, 2013.
- Kuribayashi, K., Yoshida, N., Jin, H., Orsolini, Y., and Kasai, Y.: Optimal retrieval method to estimate ozone vertical profile in the meso-  
sphere and lower thermosphere (MLT) region from submillimeter-wave limb emission spectra, *Journal of Quantitative Spectroscopy and  
Radiative Transfer*, 192, 42 – 52, <https://doi.org/https://doi.org/10.1016/j.jqsrt.2017.01.033>, [http://www.sciencedirect.com/science/article/  
pii/S0022407316306677](http://www.sciencedirect.com/science/article/pii/S0022407316306677), 2017.
- Lamarque, J.-F., Emmons, L. K., Hess, P. G., Kinnison, D. E., Tilmes, S., Vitt, F., Heald, C. L., Holland, E. A., Lauritzen, P. H., Neu,  
J., Orlando, J. J., Rasch, P. J., and Tyndall, G. K.: CAM-chem: description and evaluation of interactive atmospheric chemistry in the  
Community Earth System Model, *Geoscientific Model Development*, 5, 369–411, <https://doi.org/10.5194/gmd-5-369-2012>, [http://www.  
geosci-model-dev.net/5/369/2012/](http://www.geosci-model-dev.net/5/369/2012/), 2012.
- Limpasuvan, V., Orsolini, Y. J., Chandran, A., Garcia, R. R., and Smith, A. K.: On the composite response of the MLT to major  
sudden stratospheric warming events with elevated stratopause, *Journal of Geophysical Research: Atmospheres*, 121, 4518–4537,  
<https://doi.org/10.1002/2015JD024401>, <https://agupubs.onlinelibrary.wiley.com/doi/abs/10.1002/2015JD024401>, 2016.
- Livesey, J. N., Read, W. G., Wagner, P. A., Froidevaux, L., Lambert, A., Manney, G. L., Millán Valle, L. F., Pumphrey, H. C., Santee, M. L.,  
Schwartz, M. J., Wang, S., Fuller, R. A., Jarnot, R. F., Knosp, B. W., Martinez, E., and Lay, R. R.: Version 4.2x Level 2 data quality and  
description document., Tech. Rep. JPL D-33509, Jet Propulsion Laboratory, <http://mls.jpl.nasa.gov/data/datadocs.php>, 2018.
- Mahieu, E., Duchatelet, P., Demoulin, P., Walker, K. A., Dupuy, E., Froidevaux, L., Randall, C., Catoire, V., Strong, K., Boone, C. D.,  
Bernath, P. F., Blavier, J.-F., Blumenstock, T., Coffey, M., De Mazière, M., Griffith, D., Hannigan, J., Hase, F., Jones, N., Jucks, K. W.,  
Kagawa, A., Kasai, Y., Mebarki, Y., Mikuteit, S., Nassar, R., Notholt, J., Rinsland, C. P., Robert, C., Schrems, O., Senten, C., Smale, D.,  
Taylor, J., Tétard, C., Toon, G. C., Warneke, T., Wood, S. W., Zander, R., and Servais, C.: Validation of ACE-FTS v2.2 measurements of  
HCl, HF, CCl<sub>3</sub>F and CCl<sub>2</sub>F<sub>2</sub> using space-, balloon- and ground-based instrument observations, *Atmospheric Chemistry and Physics*, 8,  
6199–6221, <https://doi.org/10.5194/acp-8-6199-2008>, <http://www.atmos-chem-phys.net/8/6199/2008/>, 2008.
- Ochiai, S., Kikuchi, K., Nishibori, T., Manabe, T., Ozeki, H., Mizobuchi, S., and Irimajiri, Y.: Receiver Performance of the Superconduct-  
ing Submillimeter-Wave Limb-Emission Sounder (SMILES) on the International Space Station, *IEEE Transactions on Geoscience and  
Remote Sensing*, 51, 3791–3802, <https://doi.org/10.1109/TGRS.2012.2227758>, 2013.

- 455 Rienecker, M. M., Suarez, M. J., Gelaro, R., Todling, R., Bacmeister, J., Liu, E., Bosilovich, M. G., Schubert, S. D., Takacs, L., Kim, G.-K., Bloom, S., Chen, J., Collins, D., Conaty, A., da Silva, A., Gu, W., Joiner, J., Koster, R. D., Lucchesi, R., Molod, A., Owens, T., Pawson, S., Pegion, P., Redder, C. R., Reichle, R., Robertson, F. R., Ruddick, A. G., Sienkiewicz, M., and Woollen, J.: MERRA: NASA's Modern-Era Retrospective Analysis for Research and Applications, *Journal of Climate*, 24, 3624–3648, <https://doi.org/10.1175/JCLI-D-11-00015.1>, <http://dx.doi.org/10.1175/JCLI-D-11-00015.1>, 2011.
- 460 Russell III, J. M., Deaver, L. E., Luo, M., Cicerone, R. J., Park, J. H., Gordley, L. L., Toon, G. C., Gunson, M. R., Traub, W. A., Johnson, D. G., Jucks, K. W., Zander, R., and Nolt, I. G.: Validation of hydrogen fluoride measurements made by the Halogen Occultation Experiment from the UARS platform, *Journal of Geophysical Research: Atmospheres*, 101, 10 163–10 174, <https://doi.org/10.1029/95JD01705>, <https://agupubs.onlinelibrary.wiley.com/doi/abs/10.1029/95JD01705>, 1996.
- Sato, T. O., Sagawa, H., Kreyling, D., Manabe, T., Ochiai, S., Kikuchi, K., Baron, P., Mendrok, J., Urban, J., Murtagh, D., Yasui, M., and  
465 Kasai, Y.: Strato-mesospheric ClO observations by SMILES: error analysis and diurnal variation, *Atmospheric Measurement Techniques*, 5, 2809–2825, <https://doi.org/10.5194/amt-5-2809-2012>, <https://www.atmos-meas-tech.net/5/2809/2012/>, 2012.
- Sato, T. O., Sagawa, H., Yoshida, N., and Kasai, Y.: Vertical profile of  $\delta^{18}\text{O}$  from the middle stratosphere to lower mesosphere from SMILES spectra, *Atmospheric Measurement Techniques*, 7, 941–958, <https://doi.org/10.5194/amt-7-941-2014>, <https://www.atmos-meas-tech.net/7/941/2014/>, 2014.
- 470 Sato, T. O., Kuribayashi, K., Yoshida, N., and Kasai, Y.: Diurnal variation of oxygen isotopic enrichment in asymmetric-18 ozone observed by the SMILES from space, *Geophysical Research Letters*, 44, 6399–6406, <https://doi.org/10.1002/2016GL071924>, <https://agupubs.onlinelibrary.wiley.com/doi/abs/10.1002/2016GL071924>, 2017.
- Schwartz, M. J., Lambert, A., Manney, G. L., Read, W. G., Livesey, N. J., Froidevaux, L., Ao, C. O., Bernath, P. F., Boone, C. D., Cofield, R. E., Daffer, W. H., Drouin, B. J., Fetzer, E. J., Fuller, R. A., Jarnot, R. F., Jiang, J. H., Jiang, Y. B., Knosp, B. W., Krüger,  
475 K., Li, J.-L. F., Mlynchak, M. G., Pawson, S., Russell III, J. M., Santee, M. L., Snyder, W. V., Stek, P. C., Thurstans, R. P., Tompkins, A. M., Wagner, P. A., Walker, K. A., Waters, J. W., and Wu, D. L.: Validation of the Aura Microwave Limb Sounder temperature and geopotential height measurements, *Journal of Geophysical Research: Atmospheres*, 113, <https://doi.org/10.1029/2007JD008783>, <https://agupubs.onlinelibrary.wiley.com/doi/abs/10.1029/2007JD008783>, 2008.
- SMILES-NICT, T.: JEM/SMILES Level2 Research Data (L2r) Products Guide for Version 3.0.0 STRUCTURE OF SMILES L2r  
480 PRODUCTS, Tech. rep., National Institute of Information and Communications Technology, [https://smiles.nict.go.jp/pub/data/pdf/SMILES-L2r\\_Guide\\_v3.0.0.pdf](https://smiles.nict.go.jp/pub/data/pdf/SMILES-L2r_Guide_v3.0.0.pdf), 2014.
- Sugita, T., Kasai, Y., Terao, Y., Hayashida, S., Manney, G. L., Daffer, W. H., Sagawa, H., Suzuki, M., Shiotani, M., Walker, K. A., Boone, C. D., and Bernath, P. F.: HCl and ClO profiles inside the Antarctic vortex as observed by SMILES in November 2009: comparisons with MLS and ACE-FTS instruments, *Atmospheric Measurement Techniques*, 6, 3099–3113, <https://doi.org/10.5194/amt-6-3099-2013>,  
485 <https://www.atmos-meas-tech.net/6/3099/2013/>, 2013.
- Suttiwong, N.: Development and characterization of the balloon borne instrument TELIS (TErahertz and submillimeter Limb Sounder): 1.8 THz receiver, Ph.D. thesis, University of Bremen, 2010.
- US-Standard, P.: U.S Standard Atmosphere 1976, Tech. rep., U.S Government Printing Office Washington DC, 1976.
- Waters, J. W., Froidevaux, L., Harwood, R. S., Jarnot, R. F., Pickett, H. M., Read, W. G., Siegel, P. H., Cofield, R. E., Filipiak, M. J., Flower,  
490 D. A., Holden, J. R., Lau, G. K., Livesey, N. J., Manney, G. L., Pumphrey, H. C., Santee, M. L., Wu, D. L., Cuddy, D. T., Lay, R. R., Loo, M. S., Perun, V. S., Schwartz, M. J., Stek, P. C., Thurstans, R. P., Boyles, M. A., Chandra, K. M., Chavez, M. C., Chen, G.-S., Chudasama, B. V., Dodge, R., Fuller, R. A., Girard, M. A., Jiang, J. H., Jiang, Y., Knosp, B. W., Labelle, R. C., Lam, J. C., Lee, A. K., Miller, D.,

Oswald, J. E., Patel, N. C., Pukala, D. M., Quintero, O., Scaff, D. M., Vansnyder, W., Tope, M. C., Wagner, P. A., and Walch, M. J.: The Earth Observing System Microwave Limb Sounder (EOS MLS) on the Aura Satellite, *IEEE T. Geosci. Remote Sens.*, 44, 1075–1092, <https://doi.org/10.1109/TGRS.2006.873771>, 2006.

Webster, C. R., May, R. D., Toohey, D. W., Avallone, L. M., Anderson, J. G., Newman, P., Lait, L., Schoeberl, M. R., Elkins, J. W., and Chan, K. R.: Chlorine Chemistry on Polar Stratospheric Cloud Particles in the Arctic Winter, *Science*, 261, 1130–1134, <https://doi.org/10.1126/science.261.5125.1130>, <https://science.sciencemag.org/content/261/5125/1130>, 1993.

Wegner, T., Pitts, M. C., Poole, L. R., Tritscher, I., Grooß, J.-U., and Nakajima, H.: Vortex-wide chlorine activation by a mesoscale PSC event in the Arctic winter of 2009/10, *Atmospheric Chemistry and Physics*, 16, 4569–4577, <https://doi.org/10.5194/acp-16-4569-2016>, <https://www.atmos-chem-phys.net/16/4569/2016/>, 2016.

WMO: Ozone Depleting Substances (ODSs) and Related Chemicals (Chapter 1), Scientific Assessment of Ozone Depletion 2010, WMO Global Ozone Research and Monitoring Project, Report No. 52, 2010.

Xu, J., Schreier, F., Wetzel, G., De Lange, A., Birk, M., Trautmann, T., Doicu, A., and Wagner, G.: Performance Assessment of Balloon-Borne Trace Gas Sounding with the Terahertz Channel of TELIS, *Remote Sensing*, 10, <https://doi.org/10.3390/rs10020315>, <https://www.mdpi.com/2072-4292/10/2/315>, 2018.

Yamada, T., Sato, T. O., Adachi, T., Winkler, H., Kuribayashi, K., Larsson, R., Yoshida, N., Takahashi, Y., Sato, M., Chen, A. B., Hsu, R. R., Nakano, Y., Fujinawa, T., Nara, S., Uchiyama, Y., and Kasai, Y.: HO Generation Above Sprite-Producing Thunderstorms Derived from Low-Noise SMILES Observation Spectra, *Geophysical Research Letters*, 47, e60090, <https://doi.org/10.1029/2019GL085529>, <https://agupubs.onlinelibrary.wiley.com/doi/abs/10.1029/2019GL085529>, e60090 10.1029/2019GL085529, 2020.
